# Supplementary material for: Associations between objectively assessed and self-reported sedentary time with mental health in adults: an analysis of data from the Health Survey for England
Source: PubMed Central journal article supplement — BMJ Open. 2014 Mar 20;4(3):e004580. doi: 10.1136/bmjopen-2013-004580 (PMC3963121; doi:10.1136/bmjopen-2013-004580), 2014-03-20
Supplement: bmjopen-2013-004580.draft_revisions.pdf [file bmjopen-2013-004580.draft_revisions.pdf]

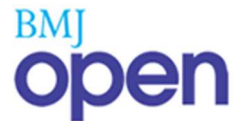

**Associations between objectively assessed and self-reported sedentary time with mental health in adults: Health Survey for England**

|                                 |                                                                                                                                                                                                                                                      |
|---------------------------------|------------------------------------------------------------------------------------------------------------------------------------------------------------------------------------------------------------------------------------------------------|
| Journal:                        | <i>BMJ Open</i>                                                                                                                                                                                                                                      |
| Manuscript ID:                  | bmjopen-2013-004580                                                                                                                                                                                                                                  |
| Article Type:                   | Research                                                                                                                                                                                                                                             |
| Date Submitted by the Author:   | 29-Nov-2013                                                                                                                                                                                                                                          |
| Complete List of Authors:       | Hamer, Mark; University College London, Department of Epidemiology and Public Health<br>Coombs, Ngaire; University College London, Epidemiology and Public Health<br>Stamatakis, Emmanuel; University College London, Epidemiology and Public Health |
| <b>Primary Subject Heading</b>: | Epidemiology                                                                                                                                                                                                                                         |
| Secondary Subject Heading:      | Sports and exercise medicine, Mental health, Public health                                                                                                                                                                                           |
| Keywords:                       | MENTAL HEALTH, EPIDEMIOLOGY, PUBLIC HEALTH                                                                                                                                                                                                           |
|                                 |                                                                                                                                                                                                                                                      |

SCHOLARONE™  
Manuscripts

1  
2  
3 **Associations between objectively assessed and self-reported sedentary**  
4  
5  
6 **time with mental health in adults**

7  
8 **Health Survey for England**  
9

10  
11 Mark Hamer<sup>1\*</sup>, Ngaire Coombs<sup>1</sup>, Emmanuel Stamatakis<sup>1,2</sup>  
12

13  
14 <sup>1</sup> Physical Activity Research Group, Department of Epidemiology and Public Health,  
15 University College London, London, UK; <sup>2</sup>Prevention Research Collaboration,  
16 School of Public Health, University of Sydney, Australia.  
17

18  
19  
20  
21 \*Address correspondence to: Dr Mark Hamer, Department of Epidemiology and  
22 Public Health, 1-19 Torrington Place, University College London, London, WC1E  
23 6BT, UK. E-mail: m.hamer@ucl.ac.uk  
24  
25  
26  
27  
28  
29  
30

31 **Short title:** Sedentary behavior and mental health  
32  
33  
34  
35

36 Word count = 2,590  
37  
38  
39  
40  
41  
42  
43  
44  
45  
46  
47  
48  
49  
50  
51  
52  
53  
54  
55  
56  
57  
58  
59  
60

## Abstract

**Background:** There is increasing interest in the association between sedentary behavior and mental health, although most studies have relied solely on self-reported measures, thus making results prone to various biases. The aim was to compare associations between objectively assessed and self-reported sedentary time with mental health in adults.

**Methods:** Participants were drawn from the 2008 Health Survey for England. The sample consisted of 11,658 (self report analysis) and 1,947 (objective data) men and women. Sedentary and physical activity were objectively measured using accelerometers (Actigraph GT1M) worn around the waist during waking hours for 7 consecutive days. The 12 – item General Health Questionnaire was administered to assess psychological distress. Objective sedentary time was defined as <200 cpm.

**Results:** The highest tertile of objective sedentary time was associated with higher risk of psychological distress (multivariate adjusted OR=1.74, 95% CI, 1.07, 2.83), as was the highest tertile of self reported total sitting time (OR=1.34, 95% CI, 1.15, 1.56). Self-reported, but not objective, moderate-vigorous physical activity was associated with lower risk of psychological distress. Only objective light-intensity activity was associated with lower risk of psychological distress.

**Conclusions:** Sedentary time is associated with adverse mental health although future work is required to explore the underlying mechanisms.

**Key words:** accelerometry, sedentary, physical activity, mental health, depression.

**Strengths and limitations**

- Use of objective physical activity assessment
- Large representative sample of the general population
- The main limitation is the cross-sectional design
- Future studies are required to examine the biological plausibility.

For peer review only

## Introduction

Adults spend approximately 60 – 70% of their waking hours in sedentary activities (1,2), which are characterized by energy expenditure below 1.5 metabolic equivalents while in a sitting or reclined posture. There is increasing interest in the association between sedentary behavior and mental health (3-12). Several longitudinal studies have demonstrated an association of self reported TV/computer time (7) and TV time alone (8) with higher risk of mental disorders, including depression and anxiety, at follow-up. However, data from other studies suggest that not all types of sedentary behaviors are related with adverse mental health (5,9). For example, in a sample of older adults from the English Longitudinal Study of Ageing, TV time but not computer use was associated with higher depressive symptoms (9). Thus, it is unclear if the effects are being driven by physiological processes linked to excessive sitting or the contrasting environmental and social contexts in which they occur.

The majority of studies to date in this area have relied on self reported measures of sedentary behaviors or total sitting time, thus making it difficult to tease apart associations between sedentary and mental health outcomes. Self-report is a potential limitation in this context as subjective mental state is a complex measure comprising of cognitive and somatic symptoms, thus self-reported mental health and sedentary behavior might have conceptual overlap. Therefore, the aim of this study was to examine the association between both objectively-assessed and self-reported sedentary time with mental health in a population sample of adults. We hypothesized that if the effects are being driven by physiological processes linked to excessive sitting we would observe consistent associations between objective and self-reported assessments of sedentary time with mental health. On the contrary, if the associations

1  
2  
3 were only observed for self-reported sedentary time this might reflect a context  
4  
5 specific effect or reporting bias.  
6  
7

## 8 9 **Methods**

### 10 **Sample and study design**

11  
12 The Health Survey for England (HSE) is a continuous survey that annually draws a  
13  
14 nationally-representative general population sample of adults living in households.  
15  
16 The sample is drawn using multi-stage stratified probability sampling with postcode  
17  
18 sectors as the primary sampling unit and the Postcode Address File as the sampling  
19  
20 frame for households. Stratification was based on geographical areas and not on  
21  
22 individual characteristics of the population. In the present analysis we used data from  
23  
24 the 2008 HSE, which had a special focus on physical activity and fitness (13). In the  
25  
26 2008 HSE the household response rate for the core sample was 64%. Ethical  
27  
28 approval for the 2008 survey was obtained from the Oxford A Research Ethics  
29  
30 Committee (reference number 07/H0604/102). These analyses considered  
31  
32 participants aged between 16 to 95 years and over with valid data on all demographic,  
33  
34 behavioural, and clinical variables of interest.  
35  
36  
37  
38  
39  
40  
41  
42

### 43 **Assessment of sedentary time and physical activity**

44  
45 *Objective measures.* A sub-sample of HSE 2008 participants were asked to wear a  
46  
47 uni-axial accelerometer that records movement on the vertical axis, the Actigraph  
48  
49 GT1M (Actigraph, Pensacola, FL, USA), during waking hours for seven consecutive  
50  
51 days. The accelerometer provides a measure of the frequency, intensity, and duration  
52  
53 of physical activity and allows classification of activity levels as sedentary, light,  
54  
55 moderate to vigorous (MVPA). The raw accelerometry data were processed using  
56  
57  
58  
59  
60

1  
2  
3 specialist software (KineSoft, New Brunswick, Canada) to produce a series of  
4  
5 standardised outcome variables (1,2). Only participants that wore the accelerometer  
6  
7 for a minimum of 10 hours per day were included in the present analyses. Although  
8  
9 participants with at least one day of valid wear have been included in these analyses,  
10  
11 the majority (70%) had between six and seven days and 84% had at least three valid  
12  
13 days. We used the following cutoff points to calculate daily times in each activity  
14  
15 intensity band: sedentary (<1.5 MET): 0-199 counts/minute; light (1.5-3 MET) 200-  
16  
17 2,019 counts/minute; MVPA (>3 MET):  $\geq 2,020$  counts/minute (1,2). All physical  
18  
19 activity and sedentary behaviour variables were converted to time (in minutes) per  
20  
21 valid day.  
22  
23

24  
25 *Self report.* The self-reported measures have been described in detail elsewhere  
26  
27 (1,14). Briefly, sedentary behavior was assessed using a set of questions enquiring  
28  
29 about weekday and weekend time spent on (i) TV (including DVDs and videos)  
30  
31 viewing and (ii) any other sitting during non-work times, including reading and  
32  
33 computer use. For those participants who were professionally active [i.e. those who  
34  
35 answered 'yes' to the question 'In the last 4 weeks, did you do any paid or unpaid  
36  
37 work either as an employee or as self-employed (including voluntary or part time  
38  
39 work)?'], another set of questions assessed the average daily times spent sitting or  
40  
41 standing while at work ('On an average workday in the last 4 weeks, how much time  
42  
43 did you usually spend sitting down or standing up?'). Physical activity was assessed  
44  
45 using the long version of the HSE questionnaire that was used in the 1997 survey for  
46  
47 the first time and was repeated in the 1998, 2006 and 2008 surveys. Questions  
48  
49 included frequency (number of days in the last 4 weeks) and duration (minutes per  
50  
51 day) of participation in walking for any purpose and any recreational exercise (e.g.  
52  
53 cycling, swimming, aerobics, gym exercises, dancing, team sports or racket sports).  
54  
55  
56  
57  
58  
59  
60

1  
2  
3 Weekly self-reported MVPA hours/week was calculated as number of days of  
4 participation multiplied by time per day in each activity type. As with objectively  
5 assessed physical activity, tertiles of TV, non-TV leisure-time sitting, total sitting, and  
6 MVPA time were derived for the analyses.  
7  
8  
9  
10

### 11 12 13 14 **Psychological distress**

15  
16 Mental health was assessed using the 12 item version of the General Health  
17 Questionnaire (GHQ-12), a widely-utilized measure of psychological distress in  
18 population-based studies (15,16). We employed a GHQ-12 cut off score of  $\geq 4$  to  
19 denote psychological distress. This definition has been validated against standardised  
20 psychiatric interviews and has been strongly associated with depression and anxiety  
21 (17).  
22  
23  
24  
25  
26  
27  
28  
29  
30  
31

### 32 **Demographic and clinic variables**

33  
34 Computer-assisted personal interviewing modules assessed respondents'  
35 demographics, occupational status, long-standing illness, alcohol consumption, and  
36 smoking habits. Height and weight were also measured for the calculation of body  
37 mass index, computed as weight (kilograms) divided by squared height (metres).  
38  
39  
40  
41  
42  
43  
44

### 45 **Statistical analyses**

46  
47 Participants were categorised into tertiles for sedentary and activity categories. We  
48 used multiple logistic regression to compute odds ratios (OR) with accompanying  
49 95% confidence intervals (CI) for the association between sedentary time/activity and  
50 psychological distress. The models were adjusted for potential confounding factors,  
51 including age, sex, smoking (never; previous; current), frequency of alcohol intake (at  
52  
53  
54  
55  
56  
57  
58  
59  
60



1  
2  
3 least 1/wk; monthly; rarely or never), BMI (normal weight, BMI<25; overweight,  
4 BMI 25 – 30; obese, BMI > 30 kg/m<sup>2</sup>), social occupational group (professional and  
5 managerial occupations; skilled non-manual; routine and manual), highest educational  
6 qualification, (non mental health-related) long standing illness, and Actigraph wear  
7 time (for analyses involving accelerometry). Finally, the models were mutually  
8 adjusted for MVPA in the analyses using sedentary or light activity as the main  
9 exposure, or sedentary when using MVPA as the main exposure. Models were run for  
10 each main exposure including an interaction term between the main exposure and sex.  
11 This interaction term was not significant in any of the models, so analysis was sex-  
12 adjusted, but not sex stratified. The complex samples module in SPSS was used to  
13 take into account the survey design, which adjusted for uneven non-response and  
14 accounted for the clusters and stratum used in data collection. A sensitivity analysis  
15 was run for accelerometry-measured sedentary time, using a more conservative cut off  
16 of <100 CPM. Due to the large difference in sample size between accelerometry and  
17 self-reported outcomes, a second sensitivity analysis was conducted to test whether  
18 observed differences in results between accelerometry and self-reported exposures  
19 were due to differences between the accelerometry and non-accelerometry samples.  
20 Logistic regression models were run substituting sedentary/physical activity tertiles  
21 for sample type (accelerometry / non-accelerometry sample). All analyses were  
22 conducted using SPSS version 21.

## 23 24 25 26 27 28 29 30 31 32 33 34 35 36 37 38 39 40 41 42 43 44 45 46 47 48 49 **Results**

### 50 *Descriptives*

51  
52 Of the self-report sample used in the analyses (11,658), 12.7% reported psychological  
53 distress (see Table 1). Respondents with psychological distress were more likely to be  
54  
55  
56  
57  
58  
59  
60

1  
2  
3 female, from a lower social class, have a lower educational qualification, be out of  
4  
5 paid work, smoke, report a non-mental health longstanding illness, and have problems  
6  
7 with usual activities than those without psychological distress (all  $p < 0.001$ ).  
8

9  
10 Respondents with psychological distress were also more sedentary and spent on  
11  
12 average 31 and 25 min/day more in TV and non-TV leisure-time sitting respectively,  
13  
14 and 10 min/d less in self-reported MVPA ( $p < 0.001$ ).  
15

### 16 17 18 *Accelerometry-measured sedentary time and physical activity*

19  
20 Table 2 presents multivariable-adjusted associations between accelerometry-measured  
21  
22 sedentary time and physical activity, with psychological distress. Sedentary time  
23  
24 (<200 CPM) was directly associated with psychological distress after adjustment for  
25  
26 all covariables including MVPA, although this was more apparent in the highest  
27  
28 tertile (OR=1.74, 95% CI, 1.07, 2.83). Light activity (200 to 2018 CPM) was  
29  
30 inversely associated with risk for psychological distress, although the association was  
31  
32 not linear. MVPA, however, was not associated with psychological distress in any  
33  
34 models.  
35  
36  
37  
38  
39  
40

### 41 *Self-reported sedentary time and physical activity*

42  
43 Table 3 presents the associations between self-reported sedentary time and physical  
44  
45 activity with psychological distress. Total sitting time was directly associated with  
46  
47 risk of psychological distress, although only the highest tertile of sitting was different  
48  
49 to the referent group (OR=1.34, 95% CI, 1.15, 1.56). This association was largely  
50  
51 driven by 'non-TV viewing' sedentary time as the associations for TV viewing  
52  
53 demonstrated an inconsistent pattern. MVPA was inversely associated with risk of  
54  
55 psychological distress in a dose-response manner ( $p < 0.001$  for all models).  
56  
57  
58  
59  
60

### ***Sensitivity analysis***

In the sensitivity analysis using a different sedentary cut off of 100 CPM (Supplemental Table 1) similar results were found, (multivariate adjusted OR of psychological distress for the highest tertile of sedentary time compared to the lowest tertile = 2.04, 95% CI, 1.29, 3.21, p=0.005). We also examined if there were differences in prevalence of psychological distress between the accelerometry sample and main sample (Supplemental Table 2). Sample type (accelerometry vs non-accelerometry), however, was not a significant predictor of psychological distress, after adjusting for relevant covariates (age, sex, smoking, employment status, longstanding illness, and self-reported MVPA and TV time).

### **Discussion**

The aim of this study was to examine the association between objectively assessed and self reported sedentary time with mental health in a population sample of adults. Our findings consistently show an association between sedentary time and adverse mental health whether using objective or self reported measures of sedentary time. Nevertheless, in contrast to previous evidence (4,5,8,9) the associations between context specific sedentary time (TV viewing) and psychological distress were far less consistent. Given that subjective mental state is a complex measure comprising cognitive (depressed mood) and somatic symptoms (eg, lethargy, tiredness, lack of appetite, pain), this might partly influence an individual's assessment of context specific sedentary time. Our findings are not consistent with data from NHANES that showed null associations between objectively assessed sedentary time and depressive symptoms in the main sample, although did find an association among overweight/obese adults in sensitivity analyses (18). Nevertheless, our study used a composite

1  
2  
3 measure of psychological distress consisting of items on anxiety and depression, thus  
4  
5 can not be directly compared to the measure of depressive symptoms used in  
6  
7 NHANES.  
8  
9

10  
11  
12 There is mounting evidence to suggest detrimental effects of excess sedentary time on  
13  
14 mental health, although plausible biological mechanisms are currently lacking. There  
15  
16 are numerous data showing associations between sedentary time and cardio-metabolic  
17  
18 risk factors (2,19,20), thus the links with mental health might act partly through these  
19  
20 mechanisms. In particular, the role of low grade inflammation in depression has  
21  
22 gained substantial attention (21), although in a recent study C-reactive protein did not  
23  
24 explain the link between TV viewing and depressive symptoms in older adults (22).  
25  
26 Psychosocial mechanisms might also be important. For example, passive sedentary  
27  
28 activities such as TV viewing might encourage social isolation and limit the  
29  
30 development of social networks.  
31  
32  
33  
34  
35  
36  
37  
38  
39  
40  
41  
42  
43  
44  
45  
46  
47  
48  
49  
50  
51  
52  
53  
54  
55  
56  
57  
58  
59  
60

We are not aware of any other studies that have compared associations of objective  
and self reported sedentary/MVPA in relation to mental health outcomes. There was a  
consistent association between sedentary time and adverse mental health whether  
using objective or self reported measures, albeit stronger with the objective measure.  
In contrast, we observed a discrepancy in results between self-reported and  
objectively assessed MVPA in relation to psychological distress, showing associations  
only for self-reported measures. In our recent studies, where we also compared  
accelerometry and self-reported exposures but in relation to cardiometabolic  
outcomes (1,14), we found associations between MVPA and most outcomes for both

1  
2  
3 self-reported and objective measures. Thus, one interpretation of the present results is  
4 that self reported mental health and MVPA might have conceptual overlap causing  
5 participants with poor mental health to mis-report their activity levels. In addition,  
6 cognitive impairment that is sometimes associated with depression (23) could impair  
7 recall introducing bias into the results. Nevertheless, one might view objective and  
8 self reported activity as different measures since objective assessment cannot take  
9 context into account and, by definition, measure slightly different aspects of MVPA.  
10 In this regard, context might be extremely important as some of the effects of physical  
11 activity on mental health are most likely driven by factors such as social interaction  
12 whereas accelerometry is simply a measure of body movement and cannot capture  
13 contextual information such as 'where' and 'who with'.  
14  
15  
16  
17  
18  
19  
20  
21  
22  
23  
24  
25  
26  
27  
28

29  
30 Few studies have examined associations between objectively assessed physical  
31 activity and mental health, and those that have reveal inconsistent findings. For  
32 example, in a small cohort of elderly Japanese participants, physical activity was  
33 assessed objectively over one year, and inverse associations of activity with  
34 depression and stressful life events were observed (24,25). In NHANES an inverse  
35 dose response association was observed between MVPA and depressive symptoms  
36 (18). In a sample of 40 healthy females who completed a once-a-day mood rating  
37 scale for one week we found inverse associations of depressive symptoms with  
38 objectively assessed light and moderate intensity activity but not vigorous (26). Other  
39 evidence is also equivocal (27,28). The present findings suggested that only  
40 objectively assessed light intensity activity was associated with lower risk of  
41 psychological distress, which is consistent with prior evidence showing associations  
42 between objective light-intensity physical activity and self rated health in older adults  
43  
44  
45  
46  
47  
48  
49  
50  
51  
52  
53  
54  
55  
56  
57  
58  
59  
60

1  
2  
3 (29). Data from randomised controlled trials also show that light/moderate intensity  
4  
5 exercise has greater antidepressive effects (30), effects on positive mood (31), and on  
6  
7 reducing symptoms of fatigue compared with vigorous intensity (32,33). Our findings  
8  
9 therefore suggest that modifying the balance between sedentary time and light  
10  
11 intensity activity could be beneficial for mental health, as suggested by other recent  
12  
13 studies (10, 29).  
14  
15

16  
17  
18 The main limitation of this study is the cross-sectional design, which precludes us  
19  
20 from making any inferences about direction or causality. Sedentary behavior has been  
21  
22 longitudinally associated with risk of future depression in some (7,8), but not all  
23  
24 (9,11) studies thus the issue of causality remains unclear. Second, since accelerometry  
25  
26 measures were only collected over one week we do not know if this reflects habitual  
27  
28 sedentary patterns in contrast to self-reported questions that enquired about activity  
29  
30 over the last 4 weeks. However, strong test-retest reliability for MVPA ( $r=0.89$  for  
31  
32 men,  $r=0.76$  in women) was demonstrated in our validation study of 106 British adults  
33  
34 from the general population, who wore accelerometers for two non-consecutive weeks  
35  
36 over a month period (34). Undoubtedly, controlled trials are the best test of causality.  
37  
38 However, studies of community samples have several advantages in that they are  
39  
40 more representative. In the present study we aimed to minimise possible confounding  
41  
42 by controlling for key covariables. Future studies are required to examine the  
43  
44 biological plausibility of a possible association between sedentary behaviour and  
45  
46 mental health which would further our understanding of this area.  
47  
48  
49  
50

51  
52  
53 Taken together, observational studies of representative community samples are an  
54  
55 important approach for establishing links between sedentary behaviour and health  
56  
57  
58  
59  
60

1  
2  
3 outcomes, although further work is required to establish if the existing evidence  
4  
5 reflects causal associations.  
6  
7  
8  
9  
10  
11  
12  
13  
14  
15  
16  
17  
18  
19  
20  
21  
22  
23  
24  
25  
26  
27  
28  
29  
30  
31  
32  
33  
34  
35  
36  
37  
38  
39  
40  
41  
42  
43  
44  
45  
46  
47  
48  
49  
50  
51  
52  
53  
54  
55  
56  
57  
58  
59  
60

For peer review only

**Funding sources**

MH is supported by the British Heart Foundation (RE/10/005/28296); ES is supported by a National Institute for Health Research Career Development award. The funders had no role in the study design; in the collection, analysis and interpretation of data; in writing of the report; or in the decision to submit the paper for publication.

**Author contributions**

MH had full access to the data, and takes responsibility for the integrity and accuracy of the results. NC performed all statistical analyses under supervision of ES. MH drafted the manuscript. All authors contributed to the concept and design of study, and critical revision of the manuscript.

**Conflict of interest**

None of the authors have any competing interests to declare.

**Data sharing**

There is no additional data available.



## References

1. Stamatakis E, Hamer M, Tilling K, Lawlor DA. Sedentary time in relation to cardio-metabolic risk factors: differential associations for self-report vs accelerometry in working age adults. *Int J Epidemiol*. 2012;41:1328-37.
2. Healy GN, Matthews CE, Dunstan DW, Winkler EA, Owen N. Sedentary time and cardio-metabolic biomarkers in US adults: NHANES 2003-06. *Eur Heart J*. 2011;32(5):590-7.
3. Teychenne M, Ball K, Salmon J. Sedentary behavior and depression among adults: A review. *Int J Behav Med* 2010;17: 246–254.
4. Hamer M, Stamatakis E, Mishra GD. Television- and screen based activity and mental well-being in adults. *Am J Prev Med* 2010;38:375–380.
5. Atkin AJ, Adams E, Bull FC, Biddle SJ. Non-occupational sitting and mental well-being in employed adults. *Ann Behav Med* 2012;43:181-8.
6. Teychenne M, Ball K, Salmon J. Physical activity, sedentary behavior and depression among disadvantaged women. *Health Educ Res* 2010;25:632–644.
7. Sanchez-Villegas A, Ara I, Guillén-Grima F, Bes-Rastrollo M, Varo-Cenarruzabeitia JJ, Martínez-González MA . Physical activity, sedentary index, and mental disorders in the SUN cohort study. *Med Sci Sports Exerc* 2010;40:827-34.
8. Lucas M, Mekary R, Pan A, Mirzaei F, O'Reilly EJ, Willett WC, Koenen K, Okereke OI, Ascherio A. Relation between clinical depression risk and physical activity and time spent watching television in older women: a 10-year prospective follow-up study. *Am J Epidemiol* 2011;174:1017-27.
9. Hamer M, Stamatakis E. Prospective study of sedentary behavior, risk of depression and cognitive impairment. *Med Sci Sp Exerc* [epub ahead of print] doi: 10.1249/MSS.0000000000000156
10. Mekary RA, Lucas M, Pan A, et al. Isotemporal Substitution Analysis for Physical Activity, Television Watching, and Risk of Depression. *American Journal of Epidemiology*. 2013;178(3):474-483.
11. van Uffelen JG, van Gellecum YR, Burton NW, Peeters G, Heesch KC, Brown WJ. Sitting-time, physical activity, and depressive symptoms in mid-aged women. *Am J Prev Med*. 2013;45(3):276-81.
12. Sloan RA, Sawada SS, Girdano D, Liu YT, Biddle SJ, Blair SN. Associations of sedentary behavior and physical activity with psychological distress: a cross-sectional study from Singapore. *BMC Public Health*. 2013;13(1):885.
13. Joint Health Surveys Unit. The Health Survey for England 2008. Volume 2: Methods and documentation. The Information Centre for Health and Social Care, 2009, Leeds. [www.ic.nhs.uk/pubs/hse08physicalactivity](http://www.ic.nhs.uk/pubs/hse08physicalactivity) (accessed May 2010).
14. Stamatakis E, Davis M, Stathi A, Hamer M. Associations between multiple indicators of objectively-measured and self-reported sedentary behaviour and cardiometabolic risk in older adults. *Preventive Medicine*. 2012;54(1):82-87.
15. Goldberg D, Gater R, Sartorius N, Ustun TB, Piccinelli M, Gureje O, Rutter C. The validity of two versions of the GHQ in the WHO study of mental illness in general health care. *Psych Med* 1997;27:191-7.
16. Russ TC, Stamatakis E, Hamer M, Starr JM, Kivimäki M, Batty GD. Association between psychological distress and mortality: individual participant pooled analysis of 10 prospective cohort studies. *BMJ*. 2012;345:e4933.

17. Aalto AM, Elovainio M, Kivimäki M, Uutela A, Pirkola S. The Beck Depression Inventory and General Health Questionnaire as measures of depression in the general population: A validation study using the Composite International Diagnostic Interview as the gold standard. *Psychiatry Res.* 2012; 197:163-71.
18. Vallance JK, Winkler EA, Gardiner PA, Healy GN, Lynch BM, Owen N. Associations of objectively-assessed physical activity and sedentary time with depression: NHANES (2005-2006). *Prev Med* 2011;53: 284-288.
19. Stamatakis E, Hamer M, Mishra GD. Early adulthood television viewing and cardiometabolic risk profiles in early middle age: results from a population, prospective cohort study. *Diabetologia* 2012;55:311-20.
20. Stamatakis E, Hamer M, Dunstan DW. Screen-Based Entertainment Time, All-Cause Mortality, and Cardiovascular Events: Population-Based Study With Ongoing Mortality and Hospital Events Follow-Up. *J Am Coll Cardiol.* 2010;57:292-299.
21. Dowlati Y, Herrmann N, Swardfager W, Liu H, Sham L, Reim EK. A meta-analysis of cytokines in major depression. *Biol Psychiatry* 2010;67: 446-57.
22. Hamer M, Poole L, Messerli-Bürgy N. Television viewing, C-reactive protein, and depressive symptoms in older adults. *Brain Behav Immun.* 2013;33:29-32.
23. Rock PL, Roiser JP, Riedel WJ, Blackwell AD. Cognitive impairment in depression: a systematic review and meta-analysis. *Psychol Med.* 2013; 29:1-12.
24. Yoshiuchi K, Inada S, Nakahara R, Akabayashi A, Park H, Park S, Shephard RJ, et al. Stressful life events and habitual physical activity in older adults: 1-year accelerometer data from the Nakanojo Study. *Mental Health and Physical Activity* 2010.
25. Yoshiuchi K, Nakahara R, Kumano H, Kuboki T, Togo F, Watanabe E, Yasunaga A, et al. Yearlong physical activity and depressive symptoms in older Japanese adults: cross-sectional data from the Nakanojo study. *The American Journal of Geriatric Psychiatry: J Am Assoc Geriatr Psych,* 2006;14: 621-624.
26. Poole L, Steptoe A, Wawrzyniak AJ, Bostock S, Mitchell ES, Hamer M. Associations of objectively measured physical activity with daily mood ratings and psychophysiological stress responses in women. *Psychophysiology.* 2011;48:1165-72.
27. Kawada T, Katsumata M, Suzuki H, Shimizu T. Actigraphic predictors of the depressive state in students with no psychiatric disorders. *J Affect Dis* 2007;98: 117-120.
28. Janney CA, Richardson CR, Holleman RG, Glasheen C, Strath SJ, Conroy M B, Kriska AM. Gender, mental health service use and objectively measured physical activity: Data from the National Health and Nutrition Examination Survey (NHANES 2003-2004). *Mental Health and Physical Activity* 2008;1: 9-16.
29. Buman MP, Hekler EB, Haskell WL, Pruitt L, Conway TL, Cain KL, Sallis JF, Saelens BE, Frank LD, King AC. Objective light-intensity physical activity associations with rated health in older adults. *Am J Epidemiol* 2010;172:1155-65.
30. Rethorst CD, Wipfli BM, Landers DM. The antidepressive effects of exercise: a meta-analysis of randomized trials. *Sports Med.* 2009;39:491-511

- 1
  - 2
  - 3
  - 4
  - 5
  - 6
  - 7
  - 8
  - 9
  - 10
  - 11
  - 12
  - 13
  - 14
  - 15
  - 16
  - 17
  - 18
  - 19
  - 20
  - 21
  - 22
  - 23
  - 24
  - 25
  - 26
  - 27
  - 28
  - 29
  - 30
  - 31
  - 32
  - 33
  - 34
  - 35
  - 36
  - 37
  - 38
  - 39
  - 40
  - 41
  - 42
  - 43
  - 44
  - 45
  - 46
  - 47
  - 48
  - 49
  - 50
  - 51
  - 52
  - 53
  - 54
  - 55
  - 56
  - 57
  - 58
  - 59
  - 60
31. Moses J, Steptoe A, Mathews A, Edwards, S. The effects of exercise training on mental well-being in the normal population: a controlled trial. *Journal of Psychosomatic Research*, 1989;33: 47-61.
32. Puetz TW, Flowers SS, O'Connor PJ. A randomized controlled trial of the effect of aerobic exercise training on feelings of energy and fatigue in sedentary young adults with persistent fatigue. *Psychotherapy and Psychosomatics* 2008; 77(3): 167-174.
33. Puetz TW, O'Connor PJ, Dishman RK. Effects of chronic exercise on feelings of energy and fatigue: a quantitative synthesis. *Psychol Bull.* 2006;132:866-76.
34. Joint Health Surveys Unit. Health Survey for England Physical Activity Validation Study: substantive report. Information Centre for Health and Social Care, Leeds, 2007.

**Table 1:** Sample characteristics in relation to psychological distress.

| Categorical variables                         | GHQ<4 |         | GHQ>=4 |       | <i>p</i> * |      |          |
|-----------------------------------------------|-------|---------|--------|-------|------------|------|----------|
|                                               | %     | N       | %      | N     |            |      |          |
| sex (% male)                                  | 48.1  | 10172   | 38.2   | 1486  | <0.001     |      |          |
| social class (% semi-skilled manual or lower) | 21.7  | 10172   | 26.4   | 1486  | <0.001     |      |          |
| qualification (% secondary school or lower)   | 50.8  | 10172   | 58.1   | 1486  | <0.001     |      |          |
| % not in paid work                            | 33.9  | 10172   | 53.6   | 1486  | <0.001     |      |          |
| smoking (% current)                           | 20.6  | 10172   | 29.9   | 1486  | <0.001     |      |          |
| Alcohol consumption (% 5+ times a week)       | 18.5  | 10172   | 16.4   | 1486  | <0.001     |      |          |
| % with LSI** (non-mental health)              | 39.8  | 10172   | 57.3   | 1486  | <0.001     |      |          |
| % problems with usual activities              | 10.4  | 10172   | 40.5   | 1486  | <0.001     |      |          |
| Continuous variables                          | M     | SD      | N      | M     | SD         | N    | <i>p</i> |
| Age (years)                                   | 50.0  | (17.6)  | 10172  | 48.3  | (17.2)     | 1486 | 0.149    |
| BMI (kg/m <sup>2</sup> )                      | 27.3  | (5.0)   | 10172  | 27.8  | (6.0)      | 1486 | 0.046    |
| TV viewing (mins/day)                         | 167.9 | (99.6)  | 10172  | 199.3 | (133.1)    | 1486 | <0.001   |
| non-TV leisure-time sitting (mins/day)        | 126.7 | (92.0)  | 10172  | 152.0 | (119.0)    | 1486 | <0.001   |
| Total leisure-time sitting (mins/day)         | 294.6 | (136.8) | 10172  | 351.3 | (17.4)     | 1486 | <0.001   |
| Self-reported MVPA (mins/day)                 | 45.7  | (67.2)  | 10172  | 35.3  | (63.7)     | 1486 | <0.001   |
| Accel sedentary time (mins/day)               | 578.5 | (93.2)  | 1698   | 574.1 | (98.1)     | 249  | 0.386    |
| Accel light physical activity time (mins/day) | 293.9 | (85.3)  | 1698   | 288.6 | (90.5)     | 249  | 0.436    |
| Accel MVPA time (mins/day)                    | 29.2  | (25.5)  | 1698   | 25.7  | (22.4)     | 249  | 0.027    |
| Accel wear time per valid day (mins)          | 835.9 | (74.7)  | 1698   | 822.8 | (77.3)     | 249  | 0.004    |

\**p* calculated by chi-square for categorical, and by Mann-Whitney U test for continuous

\*\*Longstanding illness

**Table 2:** Multivariable-adjusted associations between accelerometry-measured sedentary time, light intensity activity, and MVPA, with psychological distress.

|                                   | N   | Model 1 <sup>a</sup> | Model 2 <sup>b</sup> | Model 3 <sup>c</sup> |
|-----------------------------------|-----|----------------------|----------------------|----------------------|
| <i>Tertiles of sedentary time</i> |     |                      |                      |                      |
| Low                               | 649 | 1.00                 | 1.00                 | 1.00                 |
| Med                               | 649 | 1.00 (0.66, 1.53)    | 1.05 (0.68, 1.62)    | 1.09 (0.70, 1.71)    |
| High                              | 649 | 1.52 (0.98, 2.35)    | 1.59 (1.01, 2.51)    | 1.74 (1.07, 2.83)    |
| <i>p</i>                          |     | 0.072                | 0.071                | 0.037                |
| <i>Tertiles of light PA time</i>  |     |                      |                      |                      |
| Low                               | 649 | 1.000                | 1.000                | 1.000                |
| Med                               | 649 | 0.62 (0.42, 0.92)    | 0.56 (0.37, 0.84)    | 0.56 (0.37, 0.84)    |
| High                              | 649 | 0.79 (0.53, 1.17)    | 0.74 (0.49, 1.12)    | 0.73 (0.48, 1.12)    |
| <i>p</i>                          |     | 0.056                | 0.021                | 0.020                |
| <i>Tertiles of MVPA</i>           |     |                      |                      |                      |
| Low                               | 649 | 1.000                | 1.000                | 1.000                |
| Med                               | 649 | 0.67 (0.45, 0.99)    | 0.81 (0.54, 1.22)    | 0.90 (0.59, 1.37)    |
| High                              | 649 | 0.84 (0.55, 1.28)    | 1.05 (0.68, 1.62)    | 1.27 (0.80, 2.04)    |
| <i>p</i>                          |     | 0.130                | 0.432                | 0.283                |

<sup>a</sup> Model 1 adjusted for age, sex, and accelerometry wear time

<sup>b</sup> Model 2 also adjusted for smoking, alcohol, education, BMI, social occupational group employment longstanding illness (non-mental only)

<sup>c</sup> Model 3 also adjusted for tertiles of accel-measured MVPA (for sedentary and light PA exposures) or sedentary time (for MVPA exposure)

**Table 3:** Multivariable-adjusted associations between self-reported total sitting time, sedentary behaviours, and MVPA with psychological distress

|                                                | N    | Model1            | Model2            | Model3            |
|------------------------------------------------|------|-------------------|-------------------|-------------------|
| <i>Tertiles of total sitting</i>               |      |                   |                   |                   |
| Low                                            | 3836 | 1.00              | 1.00              | 1.00              |
| Med                                            | 3910 | 1.11 (0.95, 1.29) | 0.99 (0.85, 1.16) | 0.97 (0.83, 1.13) |
| High                                           | 3912 | 2.07 (1.79, 2.38) | 1.41 (1.21, 1.64) | 1.34 (1.15, 1.56) |
| <i>p</i>                                       |      | <0.001            | <0.001            | <0.001            |
| <i>Tertiles of TV time</i>                     |      |                   |                   |                   |
| Low                                            | 3304 | 1.00              | 1.00              | 1.00              |
| Med                                            | 4432 | 0.89 (0.77, 1.03) | 0.84 (0.72, 0.98) | 0.83 (0.71, 0.97) |
| High                                           | 3922 | 1.56 (1.35, 1.80) | 1.14 (1.00, 1.35) | 1.11 (0.95, 1.30) |
| <i>p</i>                                       |      | <0.001            | <0.001            | <0.001            |
| <i>Tertiles of non-TV leisure-time sitting</i> |      |                   |                   |                   |
| Low                                            | 4208 | 1.00              | 1.00              | 1.00              |
| Med                                            | 3673 | 0.99 (0.86, 1.15) | 0.95 (0.82, 1.10) | 0.95 (0.82, 1.10) |
| High                                           | 3777 | 1.55 (1.35, 1.77) | 1.26 (1.09, 1.45) | 1.23 (1.07, 1.42) |
| <i>p</i>                                       |      | <0.001            | <0.001            | 0.001             |
| <i>Tertiles of weekly MVPA</i>                 |      |                   |                   |                   |
| Low                                            | 3876 | 1.000             | 1.000             | 1.000             |
| Med                                            | 3864 | 0.56 (0.49, 0.65) | 0.69 (0.59, 0.79) | 0.70 (0.60, 0.81) |
| High                                           | 3918 | 0.52 (0.45, 0.60) | 0.63 (0.54, 0.73) | 0.65 (0.56, 0.76) |
| <i>p</i>                                       |      | <0.001            | <0.001            | <0.001            |

<sup>a</sup> Model 1 adjusted for age, sex, and accelerometry wear time

<sup>b</sup> Model 2 also adjusted for smoking, alcohol, education, BMI, social occupational group employment longstanding illness (non-mental only)

<sup>c</sup> Model 3 also adjusted for tertiles of self-reported MVPA (for TV and sitting exposures) or total sitting time time (for MVPA exposure)

**Supplemental Table 1:** Multivariable-adjusted associations between accelerometry-measured sedentary time (100CPM cut-off) and psychological distress

|                                      | N   | Model 1 <sup>a</sup> | Model 2 <sup>b</sup> | Model 3 <sup>c</sup> |
|--------------------------------------|-----|----------------------|----------------------|----------------------|
| Tertiles of sedentary time (<100CPM) |     |                      |                      |                      |
| Low                                  | 649 | 1.00                 | 1.00                 | 1.00                 |
| Med                                  | 649 | 1.11 (0.74, 1.68)    | 1.19 (0.78, 1.82)    | 1.24 (0.81, 1.90)    |
| High                                 | 649 | 1.71 (1.11, 2.61)    | 1.88 (1.21, 2.92)    | 2.04 (1.29, 3.21)    |
| <i>p</i>                             |     | <i>0.027</i>         | <i>0.012</i>         | <i>0.005</i>         |

<sup>a</sup>Model 1 adjusted for age, sex, and accelerometry wear time

<sup>b</sup>Model 2 also adjusted for smoking, alcohol, education, BMI, social occupational group employment longstanding illness (non-mental only)

<sup>c</sup>Model 3 also adjusted for tertiles of accel-measured MVPA (for sedentary and light PA exposures) or sedentary time (for MVPA exposure)

**Supplemental Table 2:** Multivariable-adjusted associations between accelerometry/non accelerometry sample and psychological distress

|                          | N    | Model 1 <sup>a</sup> | Model 2 <sup>b</sup> | Model 3 <sup>c</sup> |
|--------------------------|------|----------------------|----------------------|----------------------|
| Sample                   |      |                      |                      |                      |
| Accelerometer sample     | 1944 | 1.00                 | 1.00                 | 1.00                 |
| Non-accelerometer sample | 9714 | 0.99 (0.86, 1.15)    | 0.98 (0.84, 1.15)    | 0.97 (0.83, 1.13)    |
| <i>p</i>                 |      | <i>0.927</i>         | <i>0.830</i>         | <i>0.684</i>         |

<sup>a</sup>Model 1 adjusted for age, sex, and accelerometry wear time

<sup>b</sup>Model 2 also adjusted for smoking, alcohol, education, BMI, social occupational group employment longstanding illness (non-mental only)

<sup>c</sup>Model 3 also adjusted for tertiles of self-reported MVPA and TV time

STROBE Statement— Associations between objectively assessed and self-reported sedentary time with mental health in adults Health Survey for England

|                              | Page No | Recommendation                                                                                                                                                                                                                                                                                                                                                                                                                                                                                                                                                                                                                                                                                   |
|------------------------------|---------|--------------------------------------------------------------------------------------------------------------------------------------------------------------------------------------------------------------------------------------------------------------------------------------------------------------------------------------------------------------------------------------------------------------------------------------------------------------------------------------------------------------------------------------------------------------------------------------------------------------------------------------------------------------------------------------------------|
| <b>Title and abstract</b>    | 1       | (a) Indicate the study's design with a commonly used term in the title or the abstract<br>(b) Provide in the abstract an informative and balanced summary of what was done and what was found                                                                                                                                                                                                                                                                                                                                                                                                                                                                                                    |
| <b>Introduction</b>          |         |                                                                                                                                                                                                                                                                                                                                                                                                                                                                                                                                                                                                                                                                                                  |
| Background/rationale         | 4       | Explain the scientific background and rationale for the investigation being reported                                                                                                                                                                                                                                                                                                                                                                                                                                                                                                                                                                                                             |
| Objectives                   | 4       | State specific objectives, including any prespecified hypotheses                                                                                                                                                                                                                                                                                                                                                                                                                                                                                                                                                                                                                                 |
| <b>Methods</b>               |         |                                                                                                                                                                                                                                                                                                                                                                                                                                                                                                                                                                                                                                                                                                  |
| Study design                 | 5       | Present key elements of study design early in the paper                                                                                                                                                                                                                                                                                                                                                                                                                                                                                                                                                                                                                                          |
| Setting                      | 5       | Describe the setting, locations, and relevant dates, including periods of recruitment, exposure, follow-up, and data collection                                                                                                                                                                                                                                                                                                                                                                                                                                                                                                                                                                  |
| Participants                 | 5       | (a) <i>Cohort study</i> —Give the eligibility criteria, and the sources and methods of selection of participants. Describe methods of follow-up<br><i>Case-control study</i> —Give the eligibility criteria, and the sources and methods of case ascertainment and control selection. Give the rationale for the choice of cases and controls<br><i>Cross-sectional study</i> —Give the eligibility criteria, and the sources and methods of selection of participants<br>(b) <i>Cohort study</i> —For matched studies, give matching criteria and number of exposed and unexposed<br><i>Case-control study</i> —For matched studies, give matching criteria and the number of controls per case |
| Variables                    | 5-6     | Clearly define all outcomes, exposures, predictors, potential confounders, and effect modifiers. Give diagnostic criteria, if applicable                                                                                                                                                                                                                                                                                                                                                                                                                                                                                                                                                         |
| Data sources/<br>measurement | 6       | For each variable of interest, give sources of data and details of methods of assessment (measurement). Describe comparability of assessment methods if there is more than one group                                                                                                                                                                                                                                                                                                                                                                                                                                                                                                             |
| Bias                         | 6       | Describe any efforts to address potential sources of bias                                                                                                                                                                                                                                                                                                                                                                                                                                                                                                                                                                                                                                        |
| Study size                   | 7       | Explain how the study size was arrived at                                                                                                                                                                                                                                                                                                                                                                                                                                                                                                                                                                                                                                                        |
| Quantitative variables       | 7       | Explain how quantitative variables were handled in the analyses. If applicable, describe which groupings were chosen and why                                                                                                                                                                                                                                                                                                                                                                                                                                                                                                                                                                     |
| Statistical methods          | 7-8     | (a) Describe all statistical methods, including those used to control for confounding<br>(b) Describe any methods used to examine subgroups and interactions<br>(c) Explain how missing data were addressed<br>(d) <i>Cohort study</i> —If applicable, explain how loss to follow-up was addressed<br><i>Case-control study</i> —If applicable, explain how matching of cases and controls was addressed<br><i>Cross-sectional study</i> —If applicable, describe analytical methods taking account of sampling strategy<br>(e) Describe any sensitivity analyses                                                                                                                                |

Continued on next page



**Results**

|                  |      |                                                                                                                                                                                                                                                                                                                                                                                                               |
|------------------|------|---------------------------------------------------------------------------------------------------------------------------------------------------------------------------------------------------------------------------------------------------------------------------------------------------------------------------------------------------------------------------------------------------------------|
| Participants     | 8    | (a) Report numbers of individuals at each stage of study—eg numbers potentially eligible, examined for eligibility, confirmed eligible, included in the study, completing follow-up, and analysed<br>(b) Give reasons for non-participation at each stage<br>(c) Consider use of a flow diagram                                                                                                               |
| Descriptive data | 8    | (a) Give characteristics of study participants (eg demographic, clinical, social) and information on exposures and potential confounders<br>(b) Indicate number of participants with missing data for each variable of interest<br>(c) <i>Cohort study</i> —Summarise follow-up time (eg, average and total amount)                                                                                           |
| Outcome data     | 9    | <i>Cohort study</i> —Report numbers of outcome events or summary measures over time<br><i>Case-control study</i> —Report numbers in each exposure category, or summary measures of exposure<br><i>Cross-sectional study</i> —Report numbers of outcome events or summary measures                                                                                                                             |
| Main results     | 8-10 | (a) Give unadjusted estimates and, if applicable, confounder-adjusted estimates and their precision (eg, 95% confidence interval). Make clear which confounders were adjusted for and why they were included<br>(b) Report category boundaries when continuous variables were categorized<br>(c) If relevant, consider translating estimates of relative risk into absolute risk for a meaningful time period |
| Other analyses   | 10   | Report other analyses done—eg analyses of subgroups and interactions, and sensitivity analyses                                                                                                                                                                                                                                                                                                                |

**Discussion**

|                  |       |                                                                                                                                                                            |
|------------------|-------|----------------------------------------------------------------------------------------------------------------------------------------------------------------------------|
| Key results      | 10    | Summarise key results with reference to study objectives                                                                                                                   |
| Limitations      | 10    | Discuss limitations of the study, taking into account sources of potential bias or imprecision. Discuss both direction and magnitude of any potential bias                 |
| Interpretation   | 10/13 | Give a cautious overall interpretation of results considering objectives, limitations, multiplicity of analyses, results from similar studies, and other relevant evidence |
| Generalisability | 12    | Discuss the generalisability (external validity) of the study results                                                                                                      |

**Other information**

|         |    |                                                                                                                                                               |
|---------|----|---------------------------------------------------------------------------------------------------------------------------------------------------------------|
| Funding | 12 | Give the source of funding and the role of the funders for the present study and, if applicable, for the original study on which the present article is based |
|---------|----|---------------------------------------------------------------------------------------------------------------------------------------------------------------|

\*Give information separately for cases and controls in case-control studies and, if applicable, for exposed and unexposed groups in cohort and cross-sectional studies.

**Note:** An Explanation and Elaboration article discusses each checklist item and gives methodological background and published examples of transparent reporting. The STROBE checklist is best used in conjunction with this article (freely available on the Web sites of PLoS Medicine at <http://www.plosmedicine.org/>, Annals of Internal Medicine at <http://www.annals.org/>, and Epidemiology at <http://www.epidem.com/>). Information on the STROBE Initiative is available at [www.strobe-statement.org](http://www.strobe-statement.org).

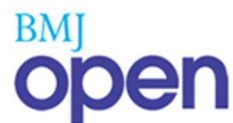

**Associations between objectively assessed and self-reported sedentary time with mental health in adults: an analysis of data from Health Survey for England**

|                                 |                                                                                                                                                                                                                                                      |
|---------------------------------|------------------------------------------------------------------------------------------------------------------------------------------------------------------------------------------------------------------------------------------------------|
| Journal:                        | <i>BMJ Open</i>                                                                                                                                                                                                                                      |
| Manuscript ID:                  | bmjopen-2013-004580.R1                                                                                                                                                                                                                               |
| Article Type:                   | Research                                                                                                                                                                                                                                             |
| Date Submitted by the Author:   | 20-Feb-2014                                                                                                                                                                                                                                          |
| Complete List of Authors:       | Hamer, Mark; University College London, Department of Epidemiology and Public Health<br>Coombs, Ngaire; University College London, Epidemiology and Public Health<br>Stamatakis, Emmanuel; University College London, Epidemiology and Public Health |
| <b>Primary Subject Heading</b>: | Epidemiology                                                                                                                                                                                                                                         |
| Secondary Subject Heading:      | Sports and exercise medicine, Mental health, Public health                                                                                                                                                                                           |
| Keywords:                       | MENTAL HEALTH, EPIDEMIOLOGY, PUBLIC HEALTH                                                                                                                                                                                                           |
|                                 |                                                                                                                                                                                                                                                      |

SCHOLARONE™  
Manuscripts

1  
2  
3 **Associations between objectively assessed and self-reported sedentary**  
4  
5 **time with mental health in adults: an analysis of data from**  
6  
7 **Health Survey for England**  
8  
9

10  
11 Mark Hamer<sup>1\*</sup>, Ngaire Coombs<sup>1</sup>, Emmanuel Stamatakis<sup>1,2</sup>  
12

13  
14 <sup>1</sup> Physical Activity Research Group, Department of Epidemiology and Public Health,  
15 University College London, London, UK; <sup>2</sup>Prevention Research Collaboration,  
16 School of Public Health, University of Sydney, Australia.  
17  
18  
19

20  
21 \*Address correspondence to: Dr Mark Hamer, Department of Epidemiology and  
22 Public Health, 1-19 Torrington Place, University College London, London, WC1E  
23 6BT, UK. E-mail: m.hamer@ucl.ac.uk  
24  
25  
26  
27  
28  
29  
30

31 **Short title:** Sedentary behavior and mental health  
32  
33  
34  
35

36 Word count = 2,699  
37  
38  
39  
40  
41  
42  
43  
44  
45  
46  
47  
48  
49  
50  
51  
52  
53  
54  
55  
56  
57  
58  
59  
60

**Abstract**

**Objectives:** There is increasing interest in the association between sedentary behavior and mental health, although most studies have relied solely on self-reported measures, thus making results prone to various biases. The aim was to compare associations between objectively assessed and self-reported sedentary time with mental health in adults.

**Setting:** Community dwelling population sample drawn from the 2008 Health Survey for England.

**Participants:** 11,658 (self-report analysis) and 1,947 (objective data) men and women.

**Primary outcome:** The 12 – item General Health Questionnaire was administered to assess psychological distress. Sedentary and physical activity (exposure) were objectively measured using accelerometers (Actigraph GT1M) worn around the waist during waking hours for 7 consecutive days.

**Results:** The highest tertile of objective sedentary time was associated with higher risk of psychological distress (multivariate adjusted OR=1.74, 95% CI, 1.07, 2.83), as was the highest tertile of self reported total sitting time (OR=1.34, 95% CI, 1.15, 1.56). Self-reported, but not objective, moderate-vigorous physical activity was associated with lower risk of psychological distress. Only objective light-intensity activity was associated with lower risk of psychological distress.

**Conclusions:** Sedentary time is associated with adverse mental health.

**Key words:** accelerometry, sedentary, physical activity, mental health, depression.

**Strengths and limitations**

- Use of objective physical activity assessment
- Large representative sample of the general population
- The main limitation is the cross-sectional design
- Future studies are required to examine the biological plausibility.

For peer review only

## Introduction

Adults spend approximately 60 – 70% of their waking hours in sedentary activities (1,2), which are characterized by energy expenditure below 1.5 metabolic equivalents while in a sitting or reclined posture. There is increasing interest in the association between sedentary behavior and mental health (3-12). Several longitudinal studies have demonstrated an association of self reported TV/computer time (7) and TV time alone (8) with higher risk of mental disorders, including depression and anxiety, at follow-up. However, data from other studies suggest that not all types of sedentary behaviors are related with adverse mental health (5,9). For example, in a sample of older adults from the English Longitudinal Study of Ageing, TV time but not computer use was associated with higher depressive symptoms (9). Thus, it is unclear if the effects are being driven by physiological processes linked to excessive sitting or the contrasting environmental and social contexts in which they occur.

The majority of studies to date in this area have relied on self reported measures of sedentary behaviors or total sitting time, thus making it difficult to tease apart associations between sedentary and mental health outcomes. To our knowledge, only one population study has previously examined associations between objectively assessed sedentary time and depressive symptoms, which demonstrated null associations (13). Self-report is a potential limitation in this context as subjective mental state is a complex measure comprising of cognitive and somatic symptoms, thus self-reported mental health and sedentary behavior might have conceptual overlap. Therefore, the aim of this study was to examine the association between both objectively-assessed and self-reported sedentary time with mental health in a

1  
2  
3 population sample of adults. We hypothesized that if the effects are being driven by  
4  
5 physiological processes linked to excessive sitting we would observe consistent  
6  
7 associations between objective and self-reported assessments of sedentary time with  
8  
9 mental health. On the contrary, if the associations were only observed for self-  
10  
11 reported sedentary time this might reflect a context specific effect or reporting bias.  
12  
13

## 14 15 16 **Methods**

### 17 18 **Sample and study design**

19  
20 The Health Survey for England (HSE) is a continuous survey that annually draws a  
21  
22 nationally-representative general population sample of adults living in households.  
23  
24 The sample is drawn using multi-stage stratified probability sampling with postcode  
25  
26 sectors as the primary sampling unit and the Postcode Address File as the sampling  
27  
28 frame for households. Stratification was based on geographical areas and not on  
29  
30 individual characteristics of the population. In the present analysis we used data from  
31  
32 the 2008 HSE, which had a special focus on physical activity and fitness (14). In the  
33  
34 2008 HSE the household response rate for the core sample was 64%. Ethical  
35  
36 approval for the 2008 survey was obtained from the Oxford A Research Ethics  
37  
38 Committee (reference number 07/H0604/102). These analyses considered  
39  
40 participants aged between 16 to 95 years and over with valid data on all demographic,  
41  
42 behavioural, and clinical variables of interest.  
43  
44  
45  
46  
47  
48  
49

### 50 **Assessment of sedentary time and physical activity**

51  
52 *Objective measures.* A sub-sample of HSE 2008 participants were asked to wear a  
53  
54 uni-axial accelerometer that records movement on the vertical axis, the Actigraph  
55  
56 GT1M (Actigraph, Pensacola, FL, USA), during waking hours for seven consecutive  
57  
58  
59  
60

1  
2  
3 days. The accelerometer provides a measure of the frequency, intensity, and duration  
4  
5 of physical activity and allows classification of activity levels as sedentary, light,  
6  
7 moderate to vigorous (MVPA). The raw accelerometry data were processed using  
8  
9 specialist software (KineSoft, New Brunswick, Canada) to produce a series of  
10  
11 standardised outcome variables (1,2). Only participants that wore the accelerometer  
12  
13 for a minimum of 10 hours per day were included in the present analyses. Although  
14  
15 participants with at least one day of valid wear have been included in these analyses,  
16  
17 the majority (70%) had between six and seven days and 84% had at least three valid  
18  
19 days. We used the following cutoff points to calculate daily times in each activity  
20  
21 intensity band: sedentary (<1.5 MET): 0-199 counts/minute; light (1.5-3 MET) 200-  
22  
23 2,019 counts/minute; MVPA (>3 MET):  $\geq 2,020$  counts/minute (1,2). All physical  
24  
25 activity and sedentary behaviour variables were converted to time (in minutes) per  
26  
27 valid day.  
28  
29  
30

31  
32 *Self report.* The self-reported measures have been described in detail elsewhere  
33  
34 (1,15). Briefly, sedentary behavior was assessed using a set of questions enquiring  
35  
36 about weekday and weekend time spent on (i) TV (including DVDs and videos)  
37  
38 viewing and (ii) any other sitting during non-work times, including reading and  
39  
40 computer use. For those participants who were professionally active [i.e. those who  
41  
42 answered 'yes' to the question 'In the last 4 weeks, did you do any paid or unpaid  
43  
44 work either as an employee or as self-employed (including voluntary or part time  
45  
46 work)?'], another set of questions assessed the average daily times spent sitting or  
47  
48 standing while at work ('On an average workday in the last 4 weeks, how much time  
49  
50 did you usually spend sitting down or standing up?'). Physical activity was assessed  
51  
52 using the long version of the HSE questionnaire that was used in the 1997 survey for  
53  
54 the first time and was repeated in the 1998, 2006 and 2008 surveys. Questions  
55  
56  
57  
58  
59  
60



1  
2  
3 included frequency (number of days in the last 4 weeks) and duration (minutes per  
4  
5 day) of participation in walking for any purpose and any recreational exercise (e.g.  
6  
7 cycling, swimming, aerobics, gym exercises, dancing, team sports or racket sports).  
8  
9 Weekly self-reported MVPA hours/week was calculated as number of days of  
10  
11 participation multiplied by time per day in each activity type. As with objectively  
12  
13 assessed physical activity, tertiles of TV, non-TV leisure-time sitting, total sitting, and  
14  
15 MVPA time were derived for the analyses.  
16  
17  
18  
19

### 20 21 **Psychological distress**

22  
23 Mental health was assessed using the 12 item version of the General Health  
24  
25 Questionnaire (GHQ-12), a widely-utilized measure of psychological distress in  
26  
27 population-based studies (16,17). We employed a GHQ-12 cut off score of  $\geq 4$  to  
28  
29 denote psychological distress. This definition has been validated against standardised  
30  
31 psychiatric interviews and has been strongly associated with depression and anxiety  
32  
33 (18).  
34  
35  
36  
37  
38

### 39 **Demographic and clinic variables**

40  
41 Computer-assisted personal interviewing modules assessed respondents'  
42  
43 demographics, occupational status, long-standing illness, alcohol consumption, and  
44  
45 smoking habits. Height and weight were also measured for the calculation of body  
46  
47 mass index, computed as weight (kilograms) divided by squared height (metres).  
48  
49  
50

### 51 **Statistical analyses**

52  
53  
54 Participants were categorised into tertiles for sedentary and activity categories. We  
55  
56 used multiple logistic regression to compute odds ratios (OR) with accompanying  
57  
58  
59  
60

1  
2  
3 95% confidence intervals (CI) for the association between sedentary time/activity and  
4  
5 psychological distress. The models were adjusted for potential confounding factors,  
6  
7 including age, sex, smoking (never; previous; current), frequency of alcohol intake (at  
8  
9 least 1/wk; monthly; rarely or never), BMI (normal weight, BMI<25; overweight,  
10  
11 BMI 25 – 30; obese, BMI > 30 kg/m<sup>2</sup>), social occupational group (professional and  
12  
13 managerial occupations; skilled non-manual; routine and manual), highest educational  
14  
15 qualification, (non mental health-related) long standing illness, and Actigraph wear  
16  
17 time (for analyses involving accelerometry). Finally, the models were mutually  
18  
19 adjusted for MVPA in the analyses using sedentary or light activity as the main  
20  
21 exposure, or sedentary when using MVPA as the main exposure. Models were run for  
22  
23 each main exposure including an interaction term between the main exposure and sex.  
24  
25 This interaction term was not significant in any of the models, so analysis was sex-  
26  
27 adjusted, but not sex stratified. The complex samples module in SPSS was used to  
28  
29 take into account the survey design, which adjusted for uneven non-response and  
30  
31 accounted for the clusters and stratum used in data collection. A sensitivity analysis  
32  
33 was run for accelerometry-measured sedentary time, using a more conservative cut off  
34  
35 of <100 CPM. Due to the large difference in sample size between accelerometry and  
36  
37 self-reported outcomes, a second sensitivity analysis was conducted to test whether  
38  
39 observed differences in results between accelerometry and self-reported exposures  
40  
41 were due to differences between the accelerometry and non-accelerometry samples.  
42  
43 Logistic regression models were run substituting sedentary/physical activity tertiles  
44  
45 for sample type (accelerometry / non-accelerometry sample). All analyses were  
46  
47 conducted using SPSS version 21.  
48  
49  
50  
51  
52  
53  
54  
55

## 56 Results

57  
58  
59  
60

### ***Descriptives***

Of the self-report sample used in the analyses (11,658), 12.7% reported psychological distress (see Table 1). Respondents with psychological distress were more likely to be female, from a lower social class, have a lower educational qualification, be out of paid work, smoke, report a non-mental health longstanding illness, and have problems with usual activities than those without psychological distress (all  $p < 0.001$ ).

Respondents with psychological distress were also more sedentary and spent on average 31 and 25 min/day more in TV and non-TV leisure-time sitting respectively, and 10 min/d less in self-reported MVPA ( $p < 0.001$ ).

### ***Accelerometry-measured sedentary time and physical activity***

Table 2 presents multivariable-adjusted associations between accelerometry-measured sedentary time and physical activity, with psychological distress. Sedentary time (<200 CPM) was directly associated with psychological distress after adjustment for all covariables including MVPA, although this was more apparent in the highest tertile (OR=1.74, 95% CI, 1.07, 2.83). Light activity (200 to 2018 CPM) was inversely associated with risk for psychological distress, although the association was not linear. MVPA, however, was not associated with psychological distress in any models.

### ***Self-reported sedentary time and physical activity***

Table 3 presents the associations between self-reported sedentary time and physical activity with psychological distress. Total sitting time was directly associated with risk of psychological distress, although only the highest tertile of sitting was different to the referent group (OR=1.34, 95% CI, 1.15, 1.56). This association was largely

1  
2  
3 driven by 'non- TV viewing' sedentary time as the associations for TV viewing  
4  
5 demonstrated an inconsistent pattern. MVPA was inversely associated with risk of  
6  
7 psychological distress in a dose-response manner ( $p < 0.001$  for all models).  
8

### 9 10 ***Sensitivity analysis***

11 In the sensitivity analysis using a different sedentary cut off of 100 CPM  
12  
13 (Supplemental Table 1) similar results were found, (multivariate adjusted OR of  
14  
15 psychological distress for the highest tertile of sedentary time compared to the lowest  
16  
17 tertile = 2.04, 95% CI, 1.29, 3.21,  $p = 0.005$ ). We also examined if there were  
18  
19 differences in prevalence of psychological distress between the accelerometry sample  
20  
21 and main sample (Supplemental Table 2). Sample type (accelerometry vs non-  
22  
23 accelerometry), however, was not a significant predictor of psychological distress,  
24  
25 after adjusting for relevant covariates (age, sex, smoking, employment status,  
26  
27 longstanding illness, and self-reported MVPA and TV time). Lastly, we examined the  
28  
29 influence of number of valid Actigraph wear days but there were no associations  
30  
31 found with psychological distress as the outcome.  
32  
33  
34  
35  
36  
37  
38

### 39 **Discussion**

40 The aim of this study was to examine the association between objectively assessed  
41  
42 and self reported sedentary time with mental health in a population sample of adults.  
43  
44 Our findings consistently show an association between sedentary time and adverse  
45  
46 mental health whether using objective or self reported measures of sedentary time.  
47  
48 Nevertheless, in contrast to previous evidence (4,5,8,9) the associations between  
49  
50 context specific sedentary time (TV viewing) and psychological distress were far less  
51  
52 consistent. Given that subjective mental state is a complex measure comprising  
53  
54 cognitive (depressed mood) and somatic symptoms (eg, lethargy, tiredness, lack of  
55  
56  
57  
58  
59  
60

1  
2  
3 appetite, pain), this might partly influence an individual's assessment of context  
4  
5 specific sedentary time. Our findings are not consistent with data from NHANES that  
6  
7 showed null associations between objectively assessed sedentary time and depressive  
8  
9 symptoms in the main sample, although did find an association among overweight/  
10  
11 obese adults in sensitivity analyses (13). Nevertheless, our study used a composite  
12  
13 measure of psychological distress consisting of items on anxiety and depression; thus  
14  
15 our data can not be directly compared to the measure of depressive symptoms used in  
16  
17 NHANES.  
18  
19

20  
21  
22  
23 There is mounting evidence to suggest detrimental effects of excess sedentary time on  
24  
25 mental health, although plausible biological mechanisms are currently lacking. There  
26  
27 are numerous data showing associations between sedentary time and cardio-metabolic  
28  
29 risk factors (2,19,20), thus the links with mental health might act partly through these  
30  
31 mechanisms. In particular, the role of low grade inflammation in depression has  
32  
33 gained substantial attention (21), although in a recent study C-reactive protein did not  
34  
35 explain the link between TV viewing and depressive symptoms in older adults (22).  
36  
37 Psychosocial mechanisms might also be important. For example, passive sedentary  
38  
39 activities such as TV viewing might encourage social isolation and limit the  
40  
41 development of social networks.  
42  
43  
44  
45  
46  
47  
48

49  
50 We are not aware of any other studies that have compared associations of objective  
51  
52 and self reported sedentary/MVPA in relation to mental health outcomes. There was a  
53  
54 consistent association between sedentary time and adverse mental health whether  
55  
56 using objective or self reported measures, albeit stronger with the objective measure.  
57  
58  
59  
60

1  
2  
3 In contrast, we observed a discrepancy in results between self-reported and  
4  
5 objectively assessed MVPA in relation to psychological distress, showing associations  
6  
7 only for self-reported measures. In our recent studies, where we also compared  
8  
9 accelerometry and self-reported exposures but in relation to cardiometabolic  
10  
11 outcomes (1,14), we found associations between MVPA and most outcomes for both  
12  
13 self-reported and objective measures. Thus, one interpretation of the present results is  
14  
15 that self reported mental health and MVPA might have conceptual overlap causing  
16  
17 participants with poor mental health to mis-report their activity levels. For example,  
18  
19 symptoms such as lethargy may cause individuals to under report their activity. In  
20  
21 addition, cognitive impairment that is sometimes associated with depression (23)  
22  
23 could impair recall introducing bias into the results. Nevertheless, one might view  
24  
25 objective and self reported activity as different measures since objective assessment  
26  
27 cannot take context into account and, by definition, measure slightly different aspects  
28  
29 of MVPA. In this regard, context might be extremely important as some of the effects  
30  
31 of physical activity on mental health are most likely driven by factors such as social  
32  
33 interaction whereas accelerometry is simply a measure of body movement and cannot  
34  
35 capture contextual information such as 'where' and 'who with'. We did not, however,  
36  
37 take contextual information into account in our analysis of self reported MVPA.  
38  
39  
40  
41  
42  
43  
44

45 Few studies have examined associations between objectively assessed physical  
46  
47 activity and mental health, and those that have reveal inconsistent findings. For  
48  
49 example, in a small cohort of elderly Japanese participants, physical activity was  
50  
51 assessed objectively over one year, and inverse associations of activity with  
52  
53 depression and stressful life events were observed (24,25). In NHANES an inverse  
54  
55 dose response association was observed between MVPA and depressive symptoms  
56  
57  
58  
59  
60

1  
2  
3 (18). In a sample of 40 healthy females who completed a once-a-day mood rating  
4 scale for one week we found inverse associations of depressive symptoms with  
5 objectively assessed light and moderate intensity activity but not vigorous (26). Other  
6 evidence is also equivocal (27,28). The present findings suggested that only  
7 objectively assessed light intensity activity was associated with lower risk of  
8 psychological distress, which is consistent with prior evidence showing associations  
9 between objective light-intensity physical activity and self rated health in older adults  
10 (29). Data from randomised controlled trials also show that light/moderate intensity  
11 exercise has greater antidepressive effects (30), effects on positive mood (31), and on  
12 reducing symptoms of fatigue compared with vigorous intensity (32,33). Lighter  
13 intensity activity may be more beneficial for mental health as greater exertion during  
14 vigorous forms of exercise may produce discomfort and shortness of breath, thus feel  
15 less enjoyable. Our findings therefore suggest that modifying the balance between  
16 sedentary time and light intensity activity could be beneficial for mental health, as  
17 suggested by other recent studies (10, 29).  
18  
19  
20  
21  
22  
23  
24  
25  
26  
27  
28  
29  
30  
31  
32  
33  
34  
35  
36  
37

38 The main limitation of this study is the cross-sectional design, which precludes us  
39 from making any inferences about direction or causality. Sedentary behavior has been  
40 longitudinally associated with risk of future depression in some (7,8), but not all  
41 (9,11) studies; thus the issue of causality remains unclear. Second, since  
42 accelerometry measures were only collected over one week we do not know if this  
43 reflects habitual sedentary patterns in contrast to self-reported questions that enquired  
44 about activity over the last 4 weeks. However, strong test-retest reliability for MVPA  
45 ( $r=0.89$  for men,  $r=0.76$  in women) was demonstrated in our validation study of 106  
46 British adults from the general population, who wore accelerometers for two non-  
47  
48  
49  
50  
51  
52  
53  
54  
55  
56  
57  
58  
59  
60

1  
2  
3 consecutive weeks over a month period (34). Undoubtedly, controlled trials are the  
4  
5 best test of causality. However, studies of community samples have several  
6  
7 advantages in that they are more representative. In the present study we aimed to  
8  
9 minimise possible confounding by controlling for key covariables. Future studies are  
10  
11 required to examine the biological plausibility of a possible association between  
12  
13 sedentary behaviour and mental health which would further our understanding of this  
14  
15 area.  
16  
17  
18  
19

20  
21 Taken together, observational studies of representative community samples are an  
22  
23 important approach for establishing links between sedentary behaviour and health  
24  
25 outcomes, although further work is required to establish if the existing evidence  
26  
27 reflects causal associations.  
28  
29  
30  
31  
32  
33  
34  
35  
36  
37  
38  
39  
40  
41  
42  
43  
44  
45  
46  
47  
48  
49  
50  
51  
52  
53  
54  
55  
56  
57  
58  
59  
60



**Funding sources**

MH is supported by the British Heart Foundation (RE/10/005/28296); ES is supported by a National Institute for Health Research Career Development award. The funders had no role in the study design; in the collection, analysis and interpretation of data; in writing of the report; or in the decision to submit the paper for publication.

**Author contributions**

MH had full access to the data, and takes responsibility for the integrity and accuracy of the results. NC performed all statistical analyses under supervision of ES. MH drafted the manuscript. All authors contributed to the concept and design of study, and critical revision of the manuscript.

**Conflict of interest**

None of the authors have any competing interests to declare.

**Data sharing**

No additional data available.

## References

1. Stamatakis E, Hamer M, Tilling K, et al. Sedentary time in relation to cardio-metabolic risk factors: differential associations for self-report vs accelerometry in working age adults. *Int J Epidemiol*. 2012;41:1328-37.
2. Healy GN, Matthews CE, Dunstan DW, et al. Sedentary time and cardio-metabolic biomarkers in US adults: NHANES 2003-06. *Eur Heart J*. 2011;32(5):590-7.
3. Teychenne M, Ball K, Salmon J. Sedentary behavior and depression among adults: A review. *Int J Behav Med* 2010;17: 246–254.
4. Hamer M, Stamatakis E, Mishra GD. Television- and screen based activity and mental well-being in adults. *Am J Prev Med* 2010;38:375–380.
5. Atkin AJ, Adams E, Bull FC, et al. Non-occupational sitting and mental well-being in employed adults. *Ann Behav Med* 2012;43:181-8.
6. Teychenne M, Ball K, Salmon J. Physical activity, sedentary behavior and depression among disadvantaged women. *Health Educ Res* 2010;25:632–644.
7. Sanchez-Villegas A, Ara I, Guillén-Grima F, et al . Physical activity, sedentary index, and mental disorders in the SUN cohort study. *Med Sci Sports Exerc* 2010;40:827-34.
8. Lucas M, Mekary R, Pan A, et al. Relation between clinical depression risk and physical activity and time spent watching television in older women: a 10-year prospective follow-up study. *Am J Epidemiol* 2011;174:1017-27.
9. Hamer M, Stamatakis E. Prospective study of sedentary behavior, risk of depression and cognitive impairment. *Med Sci Sp Exerc* [epub ahead of print] doi: 10.1249/MSS.0000000000000156
10. Mekary RA, Lucas M, Pan A, et al. Isotemporal Substitution Analysis for Physical Activity, Television Watching, and Risk of Depression. *American Journal of Epidemiology*. 2013;178(3):474-483.
11. van Uffelen JG, van Gellecum YR, Burton NW, et al. Sitting-time, physical activity, and depressive symptoms in mid-aged women. *Am J Prev Med*. 2013;45(3):276-81.
12. Sloan RA, Sawada SS, Girdano D, et al. Associations of sedentary behavior and physical activity with psychological distress: a cross-sectional study from Singapore. *BMC Public Health*. 2013;13(1):885.
13. Vallance JK, Winkler EA, Gardiner PA, et al. Associations of objectively-assessed physical activity and sedentary time with depression: NHANES (2005-2006). *Prev Med* 2011;53: 284-288.
14. Joint Health Surveys Unit. The Health Survey for England 2008. Volume 2: Methods and documentation. The Information Centre for Health and Social Care, 2009, Leeds. [www.ic.nhs.uk/pubs/hse08physicalactivity](http://www.ic.nhs.uk/pubs/hse08physicalactivity) (accessed May 2010).
15. Stamatakis E, Davis M, Stathi A, et al. Associations between multiple indicators of objectively-measured and self-reported sedentary behaviour and cardiometabolic risk in older adults. *Preventive Medicine*. 2012;54(1):82-87.
16. Goldberg D, Gater R, Sartorius N, et al. The validity of two versions of the GHQ in the WHO study of mental illness in general health care. *Psych Med* 1997;27:191-7.

17. Russ TC, Stamatakis E, Hamer M, et al. Association between psychological distress and mortality: individual participant pooled analysis of 10 prospective cohort studies. *BMJ*. 2012;345:e4933.
18. Aalto AM, Elovainio M, Kivimäki M, et al. The Beck Depression Inventory and General Health Questionnaire as measures of depression in the general population: A validation study using the Composite International Diagnostic Interview as the gold standard. *Psychiatry Res*. 2012; 197:163-71.
19. Stamatakis E, Hamer M, Mishra GD. Early adulthood television viewing and cardiometabolic risk profiles in early middle age: results from a population, prospective cohort study. *Diabetologia* 2012;55:311-20.
20. Stamatakis E, Hamer M, Dunstan DW. Screen-Based Entertainment Time, All-Cause Mortality, and Cardiovascular Events: Population-Based Study With Ongoing Mortality and Hospital Events Follow-Up. *J Am Coll Cardiol*. 2010;57:292-299.
21. Dowlati Y, Herrmann N, Swardfager W, et al. A meta-analysis of cytokines in major depression. *Biol Psychiatry* 2010;67: 446-57.
22. Hamer M, Poole L, Messerli-Bürgy N. Television viewing, C-reactive protein, and depressive symptoms in older adults. *Brain Behav Immun*. 2013;33:29-32.
23. Rock PL, Roiser JP, Riedel WJ, et al. Cognitive impairment in depression: a systematic review and meta-analysis. *Psychol Med*. 2013; 29:1-12.
24. Yoshiuchi K, Inada S, Nakahara R, et al. Stressful life events and habitual physical activity in older adults: 1-year accelerometer data from the Nakanajo Study. *Mental Health and Physical Activity* 2010.
25. Yoshiuchi K, Nakahara R, Kumano H, et al. Yearlong physical activity and depressive symptoms in older Japanese adults: cross-sectional data from the Nakanajo study. *The American Journal of Geriatric Psychiatry: J Am Assoc Geriatr Psych*, 2006;14: 621-624.
26. Poole L, Steptoe A, Wawrzyniak AJ, et al. Associations of objectively measured physical activity with daily mood ratings and psychophysiological stress responses in women. *Psychophysiology*. 2011;48:1165-72.
27. Kawada T, Katsumata M, Suzuki H, et al. Actigraphic predictors of the depressive state in students with no psychiatric disorders. *J Affect Dis* 2007;98: 117-120.
28. Janney CA, Richardson CR, Holleman RG, et al. Gender, mental health service use and objectively measured physical activity: Data from the National Health and Nutrition Examination Survey (NHANES 2003-2004). *Mental Health and Physical Activity* 2008;1: 9-16.
29. Buman MP, Hekler EB, Haskell WL, et al. Objective light-intensity physical activity associations with rated health in older adults. *Am J Epidemiol* 2010;172:1155-65.
30. Rethorst CD, Wipfli BM, Landers DM. The antidepressive effects of exercise: a meta-analysis of randomized trials. *Sports Med*. 2009;39:491-511
31. Moses J, Steptoe A, Mathews A, et al. The effects of exercise training on mental well-being in the normal population: a controlled trial. *Journal of Psychosomatic Research*, 1989;33: 47-61.
32. Puetz TW, Flowers SS, O'Connor PJ. A randomized controlled trial of the effect of aerobic exercise training on feelings of energy and fatigue in sedentary young adults with persistent fatigue. *Psychotherapy and Psychosomatics* 2008; 77(3): 167-174.

- 1
- 2
- 3 33. Puetz TW, O'Connor PJ, Dishman RK. Effects of chronic exercise on feelings
- 4 of energy and fatigue: a quantitative synthesis. Psychol Bull. 2006;132:866-
- 5 76.
- 6 34. Joint Health Surveys Unit. Health Survey for England Physical Activity
- 7 Validation Study: substantive report. Information Centre for Health and Social
- 8 Care, Leeds, 2007.
- 9
- 10
- 11
- 12
- 13
- 14
- 15
- 16
- 17
- 18
- 19
- 20
- 21
- 22
- 23
- 24
- 25
- 26
- 27
- 28
- 29
- 30
- 31
- 32
- 33
- 34
- 35
- 36
- 37
- 38
- 39
- 40
- 41
- 42
- 43
- 44
- 45
- 46
- 47
- 48
- 49
- 50
- 51
- 52
- 53
- 54
- 55
- 56
- 57
- 58
- 59
- 60

For peer review only

**Table 1:** Sample characteristics in relation to psychological distress.

| Categorical variables                         | GHQ<4 |         | GHQ>=4 |       | <i>p</i> * |      |          |
|-----------------------------------------------|-------|---------|--------|-------|------------|------|----------|
|                                               | %     | N       | %      | N     |            |      |          |
| sex (% male)                                  | 48.1  | 10172   | 38.2   | 1486  | <0.001     |      |          |
| social class (% semi-skilled manual or lower) | 21.7  | 10172   | 26.4   | 1486  | <0.001     |      |          |
| qualification (% secondary school or lower)   | 50.8  | 10172   | 58.1   | 1486  | <0.001     |      |          |
| % not in paid work                            | 33.9  | 10172   | 53.6   | 1486  | <0.001     |      |          |
| smoking (% current)                           | 20.6  | 10172   | 29.9   | 1486  | <0.001     |      |          |
| Alcohol consumption (% 5+ times a week)       | 18.5  | 10172   | 16.4   | 1486  | <0.001     |      |          |
| % with LSI** (non-mental health)              | 39.8  | 10172   | 57.3   | 1486  | <0.001     |      |          |
| % problems with usual activities              | 10.4  | 10172   | 40.5   | 1486  | <0.001     |      |          |
| Continuous variables                          | M     | SD      | N      | M     | SD         | N    | <i>p</i> |
| Age (years)                                   | 50.0  | (17.6)  | 10172  | 48.3  | (17.2)     | 1486 | 0.149    |
| BMI (kg/m <sup>2</sup> )                      | 27.3  | (5.0)   | 10172  | 27.8  | (6.0)      | 1486 | 0.046    |
| TV viewing (mins/day)                         | 167.9 | (99.6)  | 10172  | 199.3 | (133.1)    | 1486 | <0.001   |
| non-TV leisure-time sitting (mins/day)        | 126.7 | (92.0)  | 10172  | 152.0 | (119.0)    | 1486 | <0.001   |
| Total leisure-time sitting (mins/day)         | 294.6 | (136.8) | 10172  | 351.3 | (17.4)     | 1486 | <0.001   |
| Self-reported MVPA (mins/day)                 | 45.7  | (67.2)  | 10172  | 35.3  | (63.7)     | 1486 | <0.001   |
| Accel sedentary time (mins/day)               | 578.5 | (93.2)  | 1698   | 574.1 | (98.1)     | 249  | 0.386    |
| Accel light physical activity time (mins/day) | 293.9 | (85.3)  | 1698   | 288.6 | (90.5)     | 249  | 0.436    |
| Accel MVPA time (mins/day)                    | 29.2  | (25.5)  | 1698   | 25.7  | (22.4)     | 249  | 0.027    |
| Accel wear time per valid day (mins)          | 835.9 | (74.7)  | 1698   | 822.8 | (77.3)     | 249  | 0.004    |

\**p* calculated by chi-square for categorical, and by Mann-Whitney U test for continuous

\*\*Longstanding illness

**Table 2:** Multivariable-adjusted associations between accelerometry-measured sedentary time, light intensity activity, and MVPA, with psychological distress.

|                                   | N   | Model 1 <sup>a</sup> | Model 2 <sup>b</sup> | Model 3 <sup>c</sup> |
|-----------------------------------|-----|----------------------|----------------------|----------------------|
| <i>Tertiles of sedentary time</i> |     |                      |                      |                      |
| Low                               | 649 | 1.00                 | 1.00                 | 1.00                 |
| Med                               | 649 | 1.00 (0.66, 1.53)    | 1.05 (0.68, 1.62)    | 1.09 (0.70, 1.71)    |
| High                              | 649 | 1.52 (0.98, 2.35)    | 1.59 (1.01, 2.51)    | 1.74 (1.07, 2.83)    |
| <i>p</i>                          |     | 0.072                | 0.071                | 0.037                |
| <i>Tertiles of light PA time</i>  |     |                      |                      |                      |
| Low                               | 649 | 1.000                | 1.000                | 1.000                |
| Med                               | 649 | 0.62 (0.42, 0.92)    | 0.56 (0.37, 0.84)    | 0.56 (0.37, 0.84)    |
| High                              | 649 | 0.79 (0.53, 1.17)    | 0.74 (0.49, 1.12)    | 0.73 (0.48, 1.12)    |
| <i>p</i>                          |     | 0.056                | 0.021                | 0.020                |
| <i>Tertiles of MVPA</i>           |     |                      |                      |                      |
| Low                               | 649 | 1.000                | 1.000                | 1.000                |
| Med                               | 649 | 0.67 (0.45, 0.99)    | 0.81 (0.54, 1.22)    | 0.90 (0.59, 1.37)    |
| High                              | 649 | 0.84 (0.55, 1.28)    | 1.05 (0.68, 1.62)    | 1.27 (0.80, 2.04)    |
| <i>p</i>                          |     | 0.130                | 0.432                | 0.283                |

<sup>a</sup> Model 1 adjusted for age, sex, and accelerometry wear time

<sup>b</sup> Model 2 also adjusted for smoking, alcohol, education, BMI, social occupational group employment longstanding illness (non-mental only)

<sup>c</sup> Model 3 also adjusted for tertiles of accel-measured MVPA (for sedentary and light PA exposures) or sedentary time (for MVPA exposure)

**Table 3:** Multivariable-adjusted associations between self-reported total sitting time, sedentary behaviours, and MVPA with psychological distress

|                                                | N    | Model1            | Model2            | Model3            |
|------------------------------------------------|------|-------------------|-------------------|-------------------|
| <i>Tertiles of total sitting</i>               |      |                   |                   |                   |
| Low                                            | 3836 | 1.00              | 1.00              | 1.00              |
| Med                                            | 3910 | 1.11 (0.95, 1.29) | 0.99 (0.85, 1.16) | 0.97 (0.83, 1.13) |
| High                                           | 3912 | 2.07 (1.79, 2.38) | 1.41 (1.21, 1.64) | 1.34 (1.15, 1.56) |
| <i>p</i>                                       |      | <0.001            | <0.001            | <0.001            |
| <i>Tertiles of TV time</i>                     |      |                   |                   |                   |
| Low                                            | 3304 | 1.00              | 1.00              | 1.00              |
| Med                                            | 4432 | 0.89 (0.77, 1.03) | 0.84 (0.72, 0.98) | 0.83 (0.71, 0.97) |
| High                                           | 3922 | 1.56 (1.35, 1.80) | 1.14 (1.00, 1.35) | 1.11 (0.95, 1.30) |
| <i>p</i>                                       |      | <0.001            | <0.001            | <0.001            |
| <i>Tertiles of non-TV leisure-time sitting</i> |      |                   |                   |                   |
| Low                                            | 4208 | 1.00              | 1.00              | 1.00              |
| Med                                            | 3673 | 0.99 (0.86, 1.15) | 0.95 (0.82, 1.10) | 0.95 (0.82, 1.10) |
| High                                           | 3777 | 1.55 (1.35, 1.77) | 1.26 (1.09, 1.45) | 1.23 (1.07, 1.42) |
| <i>p</i>                                       |      | <0.001            | <0.001            | 0.001             |
| <i>Tertiles of weekly MVPA</i>                 |      |                   |                   |                   |
| Low                                            | 3876 | 1.000             | 1.000             | 1.000             |
| Med                                            | 3864 | 0.56 (0.49, 0.65) | 0.69 (0.59, 0.79) | 0.70 (0.60, 0.81) |
| High                                           | 3918 | 0.52 (0.45, 0.60) | 0.63 (0.54, 0.73) | 0.65 (0.56, 0.76) |
| <i>p</i>                                       |      | <0.001            | <0.001            | <0.001            |

<sup>a</sup> Model 1 adjusted for age, sex, and accelerometry wear time

<sup>b</sup> Model 2 also adjusted for smoking, alcohol, education, BMI, social occupational group employment longstanding illness (non-mental only)

<sup>c</sup> Model 3 also adjusted for tertiles of self-reported MVPA (for TV and sitting exposures) or total sitting time time (for MVPA exposure)

1  
2  
3 **Associations between objectively assessed and self-reported sedentary**  
4

5  
6 **time with mental health in adults: an analysis of data from**  
7

8 **Health Survey for England**  
9

10  
11 Mark Hamer<sup>1\*</sup>, Ngaire Coombs<sup>1</sup>, Emmanuel Stamatakis<sup>1,2</sup>  
12

13  
14 <sup>1</sup> Physical Activity Research Group, Department of Epidemiology and Public Health,  
15 University College London, London, UK; <sup>2</sup>Prevention Research Collaboration,  
16 School of Public Health, University of Sydney, Australia.  
17

18  
19  
20  
21 \*Address correspondence to: Dr Mark Hamer, Department of Epidemiology and  
22 Public Health, 1-19 Torrington Place, University College London, London, WC1E  
23 6BT, UK. E-mail: m.hamer@ucl.ac.uk  
24  
25  
26  
27  
28  
29  
30  
31

32 **Short title:** Sedentary behavior and mental health  
33  
34  
35

36 Word count = 2,699  
37  
38  
39  
40  
41  
42  
43  
44  
45  
46  
47  
48  
49  
50  
51  
52  
53  
54  
55  
56  
57  
58  
59  
60



**Abstract**

**Objectives:** There is increasing interest in the association between sedentary behavior and mental health, although most studies have relied solely on self-reported measures, thus making results prone to various biases. The aim was to compare associations between objectively assessed and self-reported sedentary time with mental health in adults.

**Setting:** Community dwelling population sample drawn from the 2008 Health Survey for England.

**Participants:** 11,658 (self-report analysis) and 1,947 (objective data) men and women.

**Primary outcome:** The 12 – item General Health Questionnaire was administered to assess psychological distress. Sedentary and physical activity (exposure) were objectively measured using accelerometers (Actigraph GT1M) worn around the waist during waking hours for 7 consecutive days.

**Results:** The highest tertile of objective sedentary time was associated with higher risk of psychological distress (multivariate adjusted OR=1.74, 95% CI, 1.07, 2.83), as was the highest tertile of self reported total sitting time (OR=1.34, 95% CI, 1.15, 1.56). Self-reported, but not objective, moderate-vigorous physical activity was associated with lower risk of psychological distress. Only objective light-intensity activity was associated with lower risk of psychological distress.

**Conclusions:** Sedentary time is associated with adverse mental health, although future work is required to explore the underlying mechanisms.

**Key words:** accelerometry, sedentary, physical activity, mental health, depression.

### Strengths and limitations

- Use of objective physical activity assessment
- Large representative sample of the general population
- The main limitation is the cross-sectional design
- Future studies are required to examine the biological plausibility.

For peer review only

## Introduction

Adults spend approximately 60 – 70% of their waking hours in sedentary activities (1,2), which are characterized by energy expenditure below 1.5 metabolic equivalents while in a sitting or reclined posture. There is increasing interest in the association between sedentary behavior and mental health (3-12). Several longitudinal studies have demonstrated an association of self reported TV/computer time (7) and TV time alone (8) with higher risk of mental disorders, including depression and anxiety, at follow-up. However, data from other studies suggest that not all types of sedentary behaviors are related with adverse mental health (5,9). For example, in a sample of older adults from the English Longitudinal Study of Ageing, TV time but not computer use was associated with higher depressive symptoms (9). Thus, it is unclear if the effects are being driven by physiological processes linked to excessive sitting or the contrasting environmental and social contexts in which they occur.

The majority of studies to date in this area have relied on self reported measures of sedentary behaviors or total sitting time, thus making it difficult to tease apart associations between sedentary and mental health outcomes. To our knowledge, only one population study has previously examined associations between objectively assessed sedentary time and depressive symptoms, which demonstrated null associations (13). Self-report is a potential limitation in this context as subjective mental state is a complex measure comprising of cognitive and somatic symptoms, thus self-reported mental health and sedentary behavior might have conceptual overlap. Therefore, the aim of this study was to examine the association between both objectively-assessed and self-reported sedentary time with mental health in a population sample of adults. We hypothesized that if the effects are being driven by

1  
2  
3 physiological processes linked to excessive sitting we would observe consistent  
4  
5 associations between objective and self-reported assessments of sedentary time with  
6  
7 mental health. On the contrary, if the associations were only observed for self-  
8  
9 reported sedentary time this might reflect a context specific effect or reporting bias.  
10  
11

## 12 13 14 **Methods**

### 15 16 **Sample and study design**

17  
18 The Health Survey for England (HSE) is a continuous survey that annually draws a  
19  
20 nationally-representative general population sample of adults living in households.  
21  
22 The sample is drawn using multi-stage stratified probability sampling with postcode  
23  
24 sectors as the primary sampling unit and the Postcode Address File as the sampling  
25  
26 frame for households. Stratification was based on geographical areas and not on  
27  
28 individual characteristics of the population. In the present analysis we used data from  
29  
30 the 2008 HSE, which had a special focus on physical activity and fitness (14). In the  
31  
32 2008 HSE the household response rate for the core sample was 64%. Ethical  
33  
34 approval for the 2008 survey was obtained from the Oxford A Research Ethics  
35  
36 Committee (reference number 07/H0604/102). These analyses considered  
37  
38 participants aged between 16 to 95 years and over with valid data on all demographic,  
39  
40 behavioural, and clinical variables of interest.  
41  
42  
43  
44  
45  
46  
47

### 48 **Assessment of sedentary time and physical activity**

49  
50 *Objective measures.* A sub-sample of HSE 2008 participants were asked to wear a  
51  
52 uni-axial accelerometer that records movement on the vertical axis, the Actigraph  
53  
54 GT1M (Actigraph, Pensacola, FL, USA), during waking hours for seven consecutive  
55  
56 days. The accelerometer provides a measure of the frequency, intensity, and duration  
57  
58  
59  
60

1  
2  
3 of physical activity and allows classification of activity levels as sedentary, light,  
4  
5 moderate to vigorous (MVPA). The raw accelerometry data were processed using  
6  
7 specialist software (KineSoft, New Brunswick, Canada) to produce a series of  
8  
9 standardised outcome variables (1,2). Only participants that wore the accelerometer  
10  
11 for a minimum of 10 hours per day were included in the present analyses. Although  
12  
13 participants with at least one day of valid wear have been included in these analyses,  
14  
15 the majority (70%) had between six and seven days and 84% had at least three valid  
16  
17 days. We used the following cutoff points to calculate daily times in each activity  
18  
19 intensity band: sedentary (<1.5 MET): 0-199 counts/minute; light (1.5-3 MET) 200-  
20  
21 2,019 counts/minute; MVPA (>3 MET):  $\geq 2,020$  counts/minute (1,2). All physical  
22  
23 activity and sedentary behaviour variables were converted to time (in minutes) per  
24  
25 valid day.  
26  
27

28  
29 *Self report.* The self-reported measures have been described in detail elsewhere  
30  
31 (1,15). Briefly, sedentary behavior was assessed using a set of questions enquiring  
32  
33 about weekday and weekend time spent on (i) TV (including DVDs and videos)  
34  
35 viewing and (ii) any other sitting during non-work times, including reading and  
36  
37 computer use. For those participants who were professionally active [i.e. those who  
38  
39 answered 'yes' to the question 'In the last 4 weeks, did you do any paid or unpaid  
40  
41 work either as an employee or as self-employed (including voluntary or part time  
42  
43 work)?'], another set of questions assessed the average daily times spent sitting or  
44  
45 standing while at work ('On an average workday in the last 4 weeks, how much time  
46  
47 did you usually spend sitting down or standing up?'). Physical activity was assessed  
48  
49 using the long version of the HSE questionnaire that was used in the 1997 survey for  
50  
51 the first time and was repeated in the 1998, 2006 and 2008 surveys. Questions  
52  
53 included frequency (number of days in the last 4 weeks) and duration (minutes per  
54  
55  
56  
57  
58  
59  
60

1  
2  
3 day) of participation in walking for any purpose and any recreational exercise (e.g.  
4 cycling, swimming, aerobics, gym exercises, dancing, team sports or racket sports).  
5  
6  
7 Weekly self-reported MVPA hours/week was calculated as number of days of  
8 participation multiplied by time per day in each activity type. As with objectively  
9 assessed physical activity, tertiles of TV, non-TV leisure-time sitting, total sitting, and  
10 MVPA time were derived for the analyses.  
11  
12  
13  
14  
15  
16  
17

### 18 **Psychological distress**

19  
20 Mental health was assessed using the 12 item version of the General Health  
21 Questionnaire (GHQ-12), a widely-utilized measure of psychological distress in  
22 population-based studies (16,17). We employed a GHQ-12 cut off score of  $\geq 4$  to  
23 denote psychological distress. This definition has been validated against standardised  
24 psychiatric interviews and has been strongly associated with depression and anxiety  
25 (18).  
26  
27  
28  
29  
30  
31  
32  
33  
34  
35  
36

### 37 **Demographic and clinic variables**

38 Computer-assisted personal interviewing modules assessed respondents'  
39 demographics, occupational status, long-standing illness, alcohol consumption, and  
40 smoking habits. Height and weight were also measured for the calculation of body  
41 mass index, computed as weight (kilograms) divided by squared height (metres).  
42  
43  
44  
45  
46  
47  
48  
49

### 50 **Statistical analyses**

51  
52 Participants were categorised into tertiles for sedentary and activity categories. We  
53 used multiple logistic regression to compute odds ratios (OR) with accompanying  
54 95% confidence intervals (CI) for the association between sedentary time/activity and  
55  
56  
57  
58  
59  
60

1  
2  
3 psychological distress. The models were adjusted for potential confounding factors,  
4  
5 including age, sex, smoking (never; previous; current), frequency of alcohol intake (at  
6  
7 least 1/wk; monthly; rarely or never), BMI (normal weight, BMI<25; overweight,  
8  
9 BMI 25 – 30; obese, BMI > 30 kg/m<sup>2</sup>), social occupational group (professional and  
10  
11 managerial occupations; skilled non-manual; routine and manual), highest educational  
12  
13 qualification, (non mental health-related) long standing illness, and Actigraph wear  
14  
15 time (for analyses involving accelerometry). Finally, the models were mutually  
16  
17 adjusted for MVPA in the analyses using sedentary or light activity as the main  
18  
19 exposure, or sedentary when using MVPA as the main exposure. Models were run for  
20  
21 each main exposure including an interaction term between the main exposure and sex.  
22  
23 This interaction term was not significant in any of the models, so analysis was sex-  
24  
25 adjusted, but not sex stratified. The complex samples module in SPSS was used to  
26  
27 take into account the survey design, which adjusted for uneven non-response and  
28  
29 accounted for the clusters and stratum used in data collection. A sensitivity analysis  
30  
31 was run for accelerometry-measured sedentary time, using a more conservative cut off  
32  
33 of <100 CPM. Due to the large difference in sample size between accelerometry and  
34  
35 self-reported outcomes, a second sensitivity analysis was conducted to test whether  
36  
37 observed differences in results between accelerometry and self-reported exposures  
38  
39 were due to differences between the accelerometry and non-accelerometry samples.  
40  
41 Logistic regression models were run substituting sedentary/physical activity tertiles  
42  
43 for sample type (accelerometry / non-accelerometry sample). All analyses were  
44  
45 conducted using SPSS version 21.  
46  
47  
48  
49  
50

## 51 52 53 54 **Results**

### 55 56 *Descriptives*

57  
58  
59  
60

1  
2  
3 Of the self-report sample used in the analyses (11,658), 12.7% reported psychological  
4 distress (see Table 1). Respondents with psychological distress were more likely to be  
5 female, from a lower social class, have a lower educational qualification, be out of  
6 paid work, smoke, report a non-mental health longstanding illness, and have problems  
7 with usual activities than those without psychological distress (all  $p < 0.001$ ).

8  
9 Respondents with psychological distress were also more sedentary and spent on  
10 average 31 and 25 min/day more in TV and non-TV leisure-time sitting respectively,  
11 and 10 min/d less in self-reported MVPA ( $p < 0.001$ ).

### 12 13 *Accelerometry-measured sedentary time and physical activity*

14  
15 Table 2 presents multivariable-adjusted associations between accelerometry-measured  
16 sedentary time and physical activity, with psychological distress. Sedentary time  
17 (<200 CPM) was directly associated with psychological distress after adjustment for  
18 all covariables including MVPA, although this was more apparent in the highest  
19 tertile (OR=1.74, 95% CI, 1.07, 2.83). Light activity (200 to 2018 CPM) was  
20 inversely associated with risk for psychological distress, although the association was  
21 not linear. MVPA, however, was not associated with psychological distress in any  
22 models.

### 23 24 *Self-reported sedentary time and physical activity*

25  
26 Table 3 presents the associations between self-reported sedentary time and physical  
27 activity with psychological distress. Total sitting time was directly associated with  
28 risk of psychological distress, although only the highest tertile of sitting was different  
29 to the referent group (OR=1.34, 95% CI, 1.15, 1.56). This association was largely  
30 driven by 'non- TV viewing' sedentary time as the associations for TV viewing  
31  
32  
33  
34  
35  
36  
37  
38  
39  
40  
41  
42  
43  
44  
45  
46  
47  
48  
49  
50  
51  
52  
53  
54  
55  
56  
57  
58  
59  
60



1  
2  
3 demonstrated an inconsistent pattern. MVPA was inversely associated with risk of  
4  
5 psychological distress in a dose-response manner ( $p < 0.001$  for all models).  
6

### 7 *Sensitivity analysis*

8  
9 In the sensitivity analysis using a different sedentary cut off of 100 CPM  
10  
11 (Supplemental Table 1) similar results were found, (multivariate adjusted OR of  
12  
13 psychological distress for the highest tertile of sedentary time compared to the lowest  
14  
15 tertile = 2.04, 95% CI, 1.29, 3.21,  $p = 0.005$ ). We also examined if there were  
16  
17 differences in prevalence of psychological distress between the accelerometry sample  
18  
19 and main sample (Supplemental Table 2). Sample type (accelerometry vs non-  
20  
21 accelerometry), however, was not a significant predictor of psychological distress,  
22  
23 after adjusting for relevant covariates (age, sex, smoking, employment status,  
24  
25 longstanding illness, and self-reported MVPA and TV time). [Lastly, we examined the](#)  
26  
27 [influence of number of valid Actigraph wear days but there were no associations](#)  
28  
29 [found with psychological distress as the outcome.](#)  
30  
31  
32  
33  
34  
35

### 36 **Discussion**

37  
38 The aim of this study was to examine the association between objectively assessed  
39  
40 and self reported sedentary time with mental health in a population sample of adults.  
41  
42 Our findings consistently show an association between sedentary time and adverse  
43  
44 mental health whether using objective or self reported measures of sedentary time.  
45  
46 Nevertheless, in contrast to previous evidence (4,5,8,9) the associations between  
47  
48 context specific sedentary time (TV viewing) and psychological distress were far less  
49  
50 consistent. Given that subjective mental state is a complex measure comprising  
51  
52 cognitive (depressed mood) and somatic symptoms (eg, lethargy, tiredness, lack of  
53  
54 appetite, pain), this might partly influence an individual's assessment of context  
55  
56  
57  
58  
59  
60

1  
2  
3 specific sedentary time. Our findings are not consistent with data from NHANES that  
4  
5 showed null associations between objectively assessed sedentary time and depressive  
6  
7 symptoms in the main sample, although did find an association among overweight/  
8  
9 obese adults in sensitivity analyses (13). Nevertheless, our study used a composite  
10  
11 measure of psychological distress consisting of items on anxiety and depression;<sup>35</sup> thus  
12  
13 our data can not be directly compared to the measure of depressive symptoms used in  
14  
15 NHANES.  
16  
17  
18  
19  
20

21  
22 There is mounting evidence to suggest detrimental effects of excess sedentary time on  
23  
24 mental health, although plausible biological mechanisms are currently lacking. There  
25  
26 are numerous data showing associations between sedentary time and cardio-metabolic  
27  
28 risk factors (2,19,20), thus the links with mental health might act partly through these  
29  
30 mechanisms. In particular, the role of low grade inflammation in depression has  
31  
32 gained substantial attention (21), although in a recent study C-reactive protein did not  
33  
34 explain the link between TV viewing and depressive symptoms in older adults (22).  
35  
36 Psychosocial mechanisms might also be important. For example, passive sedentary  
37  
38 activities such as TV viewing might encourage social isolation and limit the  
39  
40 development of social networks.  
41  
42  
43  
44  
45  
46

47  
48 We are not aware of any other studies that have compared associations of objective  
49  
50 and self reported sedentary/MVPA in relation to mental health outcomes. There was a  
51  
52 consistent association between sedentary time and adverse mental health whether  
53  
54 using objective or self reported measures, albeit stronger with the objective measure.  
55  
56 In contrast, we observed a discrepancy in results between self-reported and  
57  
58  
59  
60

1  
2  
3 objectively assessed MVPA in relation to psychological distress, showing associations  
4  
5 only for self-reported measures. In our recent studies, where we also compared  
6  
7 accelerometry and self-reported exposures but in relation to cardiometabolic  
8  
9 outcomes (1,14), we found associations between MVPA and most outcomes for both  
10  
11 self-reported and objective measures. Thus, one interpretation of the present results is  
12  
13 that self reported mental health and MVPA might have conceptual overlap causing  
14  
15 participants with poor mental health to mis-report their activity levels. For example,  
16  
17 symptoms such as lethargy may cause individuals to under report their activity. -In  
18  
19 addition, cognitive impairment that is sometimes associated with depression (23)  
20  
21 could impair recall introducing bias into the results. Nevertheless, one might view  
22  
23 objective and self reported activity as different measures since objective assessment  
24  
25 cannot take context into account and, by definition, measure slightly different aspects  
26  
27 of MVPA. In this regard, context might be extremely important as some of the effects  
28  
29 of physical activity on mental health are most likely driven by factors such as social  
30  
31 interaction whereas accelerometry is simply a measure of body movement and cannot  
32  
33 capture contextual information such as 'where' and 'who with'. We did not, however,  
34  
35 take contextual information into account in our analysis of self reported MVPA.  
36  
37  
38  
39  
40  
41  
42

43 Few studies have examined associations between objectively assessed physical  
44  
45 activity and mental health, and those that have reveal inconsistent findings. For  
46  
47 example, in a small cohort of elderly Japanese participants, physical activity was  
48  
49 assessed objectively over one year, and inverse associations of activity with  
50  
51 depression and stressful life events were observed (24,25). In NHANES an inverse  
52  
53 dose response association was observed between MVPA and depressive symptoms  
54  
55 (18). In a sample of 40 healthy females who completed a once-a-day mood rating  
56  
57  
58  
59  
60

1  
2  
3 scale for one week we found inverse associations of depressive symptoms with  
4  
5 objectively assessed light and moderate intensity activity but not vigorous (26). Other  
6  
7 evidence is also equivocal (27,28). The present findings suggested that only  
8  
9 objectively assessed light intensity activity was associated with lower risk of  
10  
11 psychological distress, which is consistent with prior evidence showing associations  
12  
13 between objective light-intensity physical activity and self rated health in older adults  
14  
15 (29). Data from randomised controlled trials also show that light/moderate intensity  
16  
17 exercise has greater antidepressive effects (30), effects on positive mood (31), and on  
18  
19 reducing symptoms of fatigue compared with vigorous intensity (32,33). Lighter  
20  
21 intensity activity may be more beneficial for mental health as greater exertion during  
22  
23 vigorous forms of exercise may produce discomfort and shortness of breath, thus feel  
24  
25 less enjoyable. Our findings therefore suggest that modifying the balance between  
26  
27 sedentary time and light intensity activity could be beneficial for mental health, as  
28  
29 suggested by other recent studies (10, 29).  
30  
31  
32  
33  
34  
35

36  
37 The main limitation of this study is the cross-sectional design, which precludes us  
38  
39 from making any inferences about direction or causality. Sedentary behavior has been  
40  
41 longitudinally associated with risk of future depression in some (7,8), but not all  
42  
43 (9,11) studies; thus the issue of causality remains unclear. Second, since  
44  
45 accelerometry measures were only collected over one week we do not know if this  
46  
47 reflects habitual sedentary patterns in contrast to self-reported questions that enquired  
48  
49 about activity over the last 4 weeks. However, strong test-retest reliability for MVPA  
50  
51 ( $r=0.89$  for men,  $r=0.76$  in women) was demonstrated in our validation study of 106  
52  
53 British adults from the general population, who wore accelerometers for two non-  
54  
55 consecutive weeks over a month period (34). Undoubtedly, controlled trials are the  
56  
57  
58  
59  
60

1  
2  
3 best test of causality. However, studies of community samples have several  
4  
5 advantages in that they are more representative. In the present study we aimed to  
6  
7 minimise possible confounding by controlling for key covariables. Future studies are  
8  
9 required to examine the biological plausibility of a possible association between  
10  
11 sedentary behaviour and mental health which would further our understanding of this  
12  
13 area.  
14  
15

16  
17  
18 Taken together, observational studies of representative community samples are an  
19  
20 important approach for establishing links between sedentary behaviour and health  
21  
22 outcomes, although further work is required to establish if the existing evidence  
23  
24 reflects causal associations.  
25  
26  
27  
28  
29  
30  
31  
32  
33  
34  
35  
36  
37  
38  
39  
40  
41  
42  
43  
44  
45  
46  
47  
48  
49  
50  
51  
52  
53  
54  
55  
56  
57  
58  
59  
60

**Funding sources**

MH is supported by the British Heart Foundation (RE/10/005/28296); ES is supported by a National Institute for Health Research Career Development award. The funders had no role in the study design; in the collection, analysis and interpretation of data; in writing of the report; or in the decision to submit the paper for publication.

**Author contributions**

MH had full access to the data, and takes responsibility for the integrity and accuracy of the results. NC performed all statistical analyses under supervision of ES. MH drafted the manuscript. All authors contributed to the concept and design of study, and critical revision of the manuscript.

**Conflict of interest**

None of the authors have any competing interests to declare.

**Data sharing**

There is no additional data available.

## References

1. Stamatakis E, Hamer M, Tilling K, Lawlor DA. Sedentary time in relation to cardio-metabolic risk factors: differential associations for self-report vs accelerometry in working age adults. *Int J Epidemiol*. 2012;41:1328-37.
2. Healy GN, Matthews CE, Dunstan DW, Winkler EA, Owen N. Sedentary time and cardio-metabolic biomarkers in US adults: NHANES 2003-06. *Eur Heart J*. 2011;32(5):590-7.
3. Teychenne M, Ball K, Salmon J. Sedentary behavior and depression among adults: A review. *Int J Behav Med* 2010;17: 246–254.
4. Hamer M, Stamatakis E, Mishra GD. Television- and screen based activity and mental well-being in adults. *Am J Prev Med* 2010;38:375–380.
5. Atkin AJ, Adams E, Bull FC, Biddle SJ. Non-occupational sitting and mental well-being in employed adults. *Ann Behav Med* 2012;43:181-8.
6. Teychenne M, Ball K, Salmon J. Physical activity, sedentary behavior and depression among disadvantaged women. *Health Educ Res* 2010;25:632–644.
7. Sanchez-Villegas A, Ara I, Guillén-Grima F, Bes-Rastrollo M, Varo-Cenarruzabeitia JJ, Martínez-González MA . Physical activity, sedentary index, and mental disorders in the SUN cohort study. *Med Sci Sports Exerc* 2010;40:827-34.
8. Lucas M, Mekary R, Pan A, Mirzaei F, O'Reilly EJ, Willett WC, Koenen K, Okereke OI, Ascherio A. Relation between clinical depression risk and physical activity and time spent watching television in older women: a 10-year prospective follow-up study. *Am J Epidemiol* 2011;174:1017-27.
9. Hamer M, Stamatakis E. Prospective study of sedentary behavior, risk of depression and cognitive impairment. *Med Sci Sp Exerc* [epub ahead of print] doi: 10.1249/MSS.0000000000000156
10. Mekary RA, Lucas M, Pan A, et al. Isotemporal Substitution Analysis for Physical Activity, Television Watching, and Risk of Depression. *American Journal of Epidemiology*. 2013;178(3):474-483.
11. van Uffelen JG, van Gellecum YR, Burton NW, Peeters G, Heesch KC, Brown WJ. Sitting-time, physical activity, and depressive symptoms in mid-aged women. *Am J Prev Med*. 2013;45(3):276-81.
12. Sloan RA, Sawada SS, Girdano D, Liu YT, Biddle SJ, Blair SN. Associations of sedentary behavior and physical activity with psychological distress: a cross-sectional study from Singapore. *BMC Public Health*. 2013;13(1):885.
13. Vallance JK, Winkler EA, Gardiner PA, Healy GN, Lynch BM, Owen N. Associations of objectively-assessed physical activity and sedentary time with depression: NHANES (2005-2006). *Prev Med* 2011;53: 284-288.
14. Joint Health Surveys Unit. The Health Survey for England 2008. Volume 2: Methods and documentation. The Information Centre for Health and Social Care, 2009, Leeds. [www.ic.nhs.uk/pubs/hse08physicalactivity](http://www.ic.nhs.uk/pubs/hse08physicalactivity) (accessed May 2010).
15. Stamatakis E, Davis M, Stathi A, Hamer M. Associations between multiple indicators of objectively-measured and self-reported sedentary behaviour and cardiometabolic risk in older adults. *Preventive Medicine*. 2012;54(1):82-87.
16. Goldberg D, Gater R, Sartorius N, Ustun TB, Piccinelli M, Gureje O, Rutter C. The validity of two versions of the GHQ in the WHO study of mental illness in general health care. *Psych Med* 1997;27:191-7.

17. Russ TC, Stamatakis E, Hamer M, Starr JM, Kivimäki M, Batty GD. Association between psychological distress and mortality: individual participant pooled analysis of 10 prospective cohort studies. *BMJ*. 2012;345:e4933.
18. Aalto AM, Elovainio M, Kivimäki M, Uutela A, Pirkola S. The Beck Depression Inventory and General Health Questionnaire as measures of depression in the general population: A validation study using the Composite International Diagnostic Interview as the gold standard. *Psychiatry Res*. 2012; 197:163-71.
19. Stamatakis E, Hamer M, Mishra GD. Early adulthood television viewing and cardiometabolic risk profiles in early middle age: results from a population, prospective cohort study. *Diabetologia* 2012;55:311-20.
20. Stamatakis E, Hamer M, Dunstan DW. Screen-Based Entertainment Time, All-Cause Mortality, and Cardiovascular Events: Population-Based Study With Ongoing Mortality and Hospital Events Follow-Up. *J Am Coll Cardiol*. 2010;57:292-299.
21. Dowlati Y, Herrmann N, Swardfager W, Liu H, Sham L, Reim EK. A meta-analysis of cytokines in major depression. *Biol Psychiatry* 2010;67: 446-57.
22. Hamer M, Poole L, Messerli-Bürgy N. Television viewing, C-reactive protein, and depressive symptoms in older adults. *Brain Behav Immun*. 2013;33:29-32.
23. Rock PL, Roiser JP, Riedel WJ, Blackwell AD. Cognitive impairment in depression: a systematic review and meta-analysis. *Psychol Med*. 2013; 29:1-12.
24. Yoshiuchi K, Inada S, Nakahara R, Akabayashi A, Park H, Park S, Shephard RJ, et al. Stressful life events and habitual physical activity in older adults: 1-year accelerometer data from the Nakanojo Study. *Mental Health and Physical Activity* 2010.
25. Yoshiuchi K, Nakahara R, Kumano H, Kuboki T, Togo F, Watanabe E, Yasunaga A, et al. Yearlong physical activity and depressive symptoms in older Japanese adults: cross-sectional data from the Nakanojo study. *The American Journal of Geriatric Psychiatry: J Am Assoc Geriatr Psych*, 2006;14: 621-624.
26. Poole L, Steptoe A, Wawrzyniak AJ, Bostock S, Mitchell ES, Hamer M. Associations of objectively measured physical activity with daily mood ratings and psychophysiological stress responses in women. *Psychophysiology*. 2011;48:1165-72.
27. Kawada T, Katsumata M, Suzuki H, Shimizu T. Actigraphic predictors of the depressive state in students with no psychiatric disorders. *J Affect Dis* 2007;98: 117-120.
28. Janney CA, Richardson CR, Holleman RG, Glasheen C, Strath SJ, Conroy M B, Kriska AM. Gender, mental health service use and objectively measured physical activity: Data from the National Health and Nutrition Examination Survey (NHANES 2003-2004). *Mental Health and Physical Activity* 2008;1: 9-16.
29. Buman MP, Hekler EB, Haskell WL, Pruitt L, Conway TL, Cain KL, Sallis JF, Saelens BE, Frank LD, King AC. Objective light-intensity physical activity associations with rated health in older adults. *Am J Epidemiol* 2010;172:1155-65.
30. Rethorst CD, Wipfli BM, Landers DM. The antidepressive effects of exercise: a meta-analysis of randomized trials. *Sports Med*. 2009;39:491-511



- 1
  - 2
  - 3
  - 4
  - 5
  - 6
  - 7
  - 8
  - 9
  - 10
  - 11
  - 12
  - 13
  - 14
  - 15
  - 16
  - 17
  - 18
  - 19
  - 20
  - 21
  - 22
  - 23
  - 24
  - 25
  - 26
  - 27
  - 28
  - 29
  - 30
  - 31
  - 32
  - 33
  - 34
  - 35
  - 36
  - 37
  - 38
  - 39
  - 40
  - 41
  - 42
  - 43
  - 44
  - 45
  - 46
  - 47
  - 48
  - 49
  - 50
  - 51
  - 52
  - 53
  - 54
  - 55
  - 56
  - 57
  - 58
  - 59
  - 60
31. Moses J, Steptoe A, Mathews A, Edwards, S. The effects of exercise training on mental well-being in the normal population: a controlled trial. *Journal of Psychosomatic Research*, 1989;33: 47-61.
32. Puetz TW, Flowers SS, O'Connor PJ. A randomized controlled trial of the effect of aerobic exercise training on feelings of energy and fatigue in sedentary young adults with persistent fatigue. *Psychotherapy and Psychosomatics* 2008; 77(3): 167-174.
33. Puetz TW, O'Connor PJ, Dishman RK. Effects of chronic exercise on feelings of energy and fatigue: a quantitative synthesis. *Psychol Bull.* 2006;132:866-76.
34. Joint Health Surveys Unit. Health Survey for England Physical Activity Validation Study: substantive report. Information Centre for Health and Social Care, Leeds, 2007.

**Table 1:** Sample characteristics in relation to psychological distress.

| Categorical variables                         | GHQ<4 |         | GHQ>=4 |       | <i>p</i> * |      |          |
|-----------------------------------------------|-------|---------|--------|-------|------------|------|----------|
|                                               | %     | N       | %      | N     |            |      |          |
| sex (% male)                                  | 48.1  | 10172   | 38.2   | 1486  | <0.001     |      |          |
| social class (% semi-skilled manual or lower) | 21.7  | 10172   | 26.4   | 1486  | <0.001     |      |          |
| qualification (% secondary school or lower)   | 50.8  | 10172   | 58.1   | 1486  | <0.001     |      |          |
| % not in paid work                            | 33.9  | 10172   | 53.6   | 1486  | <0.001     |      |          |
| smoking (% current)                           | 20.6  | 10172   | 29.9   | 1486  | <0.001     |      |          |
| Alcohol consumption (% 5+ times a week)       | 18.5  | 10172   | 16.4   | 1486  | <0.001     |      |          |
| % with LSI** (non-mental health)              | 39.8  | 10172   | 57.3   | 1486  | <0.001     |      |          |
| % problems with usual activities              | 10.4  | 10172   | 40.5   | 1486  | <0.001     |      |          |
| Continuous variables                          | M     | SD      | N      | M     | SD         | N    | <i>p</i> |
| Age (years)                                   | 50.0  | (17.6)  | 10172  | 48.3  | (17.2)     | 1486 | 0.149    |
| BMI (kg/m <sup>2</sup> )                      | 27.3  | (5.0)   | 10172  | 27.8  | (6.0)      | 1486 | 0.046    |
| TV viewing (mins/day)                         | 167.9 | (99.6)  | 10172  | 199.3 | (133.1)    | 1486 | <0.001   |
| non-TV leisure-time sitting (mins/day)        | 126.7 | (92.0)  | 10172  | 152.0 | (119.0)    | 1486 | <0.001   |
| Total leisure-time sitting (mins/day)         | 294.6 | (136.8) | 10172  | 351.3 | (17.4)     | 1486 | <0.001   |
| Self-reported MVPA (mins/day)                 | 45.7  | (67.2)  | 10172  | 35.3  | (63.7)     | 1486 | <0.001   |
| Accel sedentary time (mins/day)               | 578.5 | (93.2)  | 1698   | 574.1 | (98.1)     | 249  | 0.386    |
| Accel light physical activity time (mins/day) | 293.9 | (85.3)  | 1698   | 288.6 | (90.5)     | 249  | 0.436    |
| Accel MVPA time (mins/day)                    | 29.2  | (25.5)  | 1698   | 25.7  | (22.4)     | 249  | 0.027    |
| Accel wear time per valid day (mins)          | 835.9 | (74.7)  | 1698   | 822.8 | (77.3)     | 249  | 0.004    |

\**p* calculated by chi-square for categorical, and by Mann-Whitney U test for continuous

\*\*Longstanding illness

**Table 2:** Multivariable-adjusted associations between accelerometry-measured sedentary time, light intensity activity, and MVPA, with psychological distress.

|                                   | N   | Model 1 <sup>a</sup> | Model 2 <sup>b</sup> | Model 3 <sup>c</sup> |
|-----------------------------------|-----|----------------------|----------------------|----------------------|
| <i>Tertiles of sedentary time</i> |     |                      |                      |                      |
| Low                               | 649 | 1.00                 | 1.00                 | 1.00                 |
| Med                               | 649 | 1.00 (0.66, 1.53)    | 1.05 (0.68, 1.62)    | 1.09 (0.70, 1.71)    |
| High                              | 649 | 1.52 (0.98, 2.35)    | 1.59 (1.01, 2.51)    | 1.74 (1.07, 2.83)    |
| <i>p</i>                          |     | 0.072                | 0.071                | 0.037                |
| <i>Tertiles of light PA time</i>  |     |                      |                      |                      |
| Low                               | 649 | 1.000                | 1.000                | 1.000                |
| Med                               | 649 | 0.62 (0.42, 0.92)    | 0.56 (0.37, 0.84)    | 0.56 (0.37, 0.84)    |
| High                              | 649 | 0.79 (0.53, 1.17)    | 0.74 (0.49, 1.12)    | 0.73 (0.48, 1.12)    |
| <i>p</i>                          |     | 0.056                | 0.021                | 0.020                |
| <i>Tertiles of MVPA</i>           |     |                      |                      |                      |
| Low                               | 649 | 1.000                | 1.000                | 1.000                |
| Med                               | 649 | 0.67 (0.45, 0.99)    | 0.81 (0.54, 1.22)    | 0.90 (0.59, 1.37)    |
| High                              | 649 | 0.84 (0.55, 1.28)    | 1.05 (0.68, 1.62)    | 1.27 (0.80, 2.04)    |
| <i>p</i>                          |     | 0.130                | 0.432                | 0.283                |

<sup>a</sup> Model 1 adjusted for age, sex, and accelerometry wear time

<sup>b</sup> Model 2 also adjusted for smoking, alcohol, education, BMI, social occupational group employment longstanding illness (non-mental only)

<sup>c</sup> Model 3 also adjusted for tertiles of accel-measured MVPA (for sedentary and light PA exposures) or sedentary time (for MVPA exposure)

**Table 3:** Multivariable-adjusted associations between self-reported total sitting time, sedentary behaviours, and MVPA with psychological distress

|                                                | N    | Model1            | Model2            | Model3            |
|------------------------------------------------|------|-------------------|-------------------|-------------------|
| <i>Tertiles of total sitting</i>               |      |                   |                   |                   |
| Low                                            | 3836 | 1.00              | 1.00              | 1.00              |
| Med                                            | 3910 | 1.11 (0.95, 1.29) | 0.99 (0.85, 1.16) | 0.97 (0.83, 1.13) |
| High                                           | 3912 | 2.07 (1.79, 2.38) | 1.41 (1.21, 1.64) | 1.34 (1.15, 1.56) |
| <i>p</i>                                       |      | <0.001            | <0.001            | <0.001            |
| <i>Tertiles of TV time</i>                     |      |                   |                   |                   |
| Low                                            | 3304 | 1.00              | 1.00              | 1.00              |
| Med                                            | 4432 | 0.89 (0.77, 1.03) | 0.84 (0.72, 0.98) | 0.83 (0.71, 0.97) |
| High                                           | 3922 | 1.56 (1.35, 1.80) | 1.14 (1.00, 1.35) | 1.11 (0.95, 1.30) |
| <i>p</i>                                       |      | <0.001            | <0.001            | <0.001            |
| <i>Tertiles of non-TV leisure-time sitting</i> |      |                   |                   |                   |
| Low                                            | 4208 | 1.00              | 1.00              | 1.00              |
| Med                                            | 3673 | 0.99 (0.86, 1.15) | 0.95 (0.82, 1.10) | 0.95 (0.82, 1.10) |
| High                                           | 3777 | 1.55 (1.35, 1.77) | 1.26 (1.09, 1.45) | 1.23 (1.07, 1.42) |
| <i>p</i>                                       |      | <0.001            | <0.001            | 0.001             |
| <i>Tertiles of weekly MVPA</i>                 |      |                   |                   |                   |
| Low                                            | 3876 | 1.000             | 1.000             | 1.000             |
| Med                                            | 3864 | 0.56 (0.49, 0.65) | 0.69 (0.59, 0.79) | 0.70 (0.60, 0.81) |
| High                                           | 3918 | 0.52 (0.45, 0.60) | 0.63 (0.54, 0.73) | 0.65 (0.56, 0.76) |
| <i>p</i>                                       |      | <0.001            | <0.001            | <0.001            |

<sup>a</sup> Model 1 adjusted for age, sex, and accelerometry wear time

<sup>b</sup> Model 2 also adjusted for smoking, alcohol, education, BMI, social occupational group employment longstanding illness (non-mental only)

<sup>c</sup> Model 3 also adjusted for tertiles of self-reported MVPA (for TV and sitting exposures) or total sitting time time (for MVPA exposure)

**Supplemental Table 1:** Multivariable-adjusted associations between accelerometry-measured sedentary time (100CPM cut-off) and psychological distress

|                                      | N   | Model 1 <sup>a</sup> | Model 2 <sup>b</sup> | Model 3 <sup>c</sup> |
|--------------------------------------|-----|----------------------|----------------------|----------------------|
| Tertiles of sedentary time (<100CPM) |     |                      |                      |                      |
| Low                                  | 649 | 1.00                 | 1.00                 | 1.00                 |
| Med                                  | 649 | 1.11 (0.74, 1.68)    | 1.19 (0.78, 1.82)    | 1.24 (0.81, 1.90)    |
| High                                 | 649 | 1.71 (1.11, 2.61)    | 1.88 (1.21, 2.92)    | 2.04 (1.29, 3.21)    |
| <i>p</i>                             |     | 0.027                | 0.012                | 0.005                |

<sup>a</sup>Model 1 adjusted for age, sex, and accelerometry wear time

<sup>b</sup>Model 2 also adjusted for smoking, alcohol, education, BMI, social occupational group employment longstanding illness (non-mental only)

<sup>c</sup>Model 3 also adjusted for tertiles of accel-measured MVPA (for sedentary and light PA exposures) or sedentary time (for MVPA exposure)

**Supplemental Table 2:** Multivariable-adjusted associations between accelerometry/non accelerometry sample and psychological distress

|                          | N    | Model 1 <sup>a</sup> | Model 2 <sup>b</sup> | Model 3 <sup>c</sup> |
|--------------------------|------|----------------------|----------------------|----------------------|
| Sample                   |      |                      |                      |                      |
| Accelerometer sample     | 1944 | 1.00                 | 1.00                 | 1.00                 |
| Non-accelerometer sample | 9714 | 0.99 (0.86, 1.15)    | 0.98 (0.84, 1.15)    | 0.97 (0.83, 1.13)    |
| <i>p</i>                 |      | 0.927                | 0.830                | 0.684                |

<sup>a</sup>Model 1 adjusted for age, sex, and accelerometry wear time

<sup>b</sup>Model 2 also adjusted for smoking, alcohol, education, BMI, social occupational group employment longstanding illness (non-mental only)

<sup>c</sup>Model 3 also adjusted for tertiles of self-reported MVPA and TV time

STROBE Statement— Associations between objectively assessed and self-reported sedentary time with mental health in adults Health Survey for England

|                              | Page No | Recommendation                                                                                                                                                                                                                                                                                                                                                                                                                                                                                                                                                                                                                                                                                   |
|------------------------------|---------|--------------------------------------------------------------------------------------------------------------------------------------------------------------------------------------------------------------------------------------------------------------------------------------------------------------------------------------------------------------------------------------------------------------------------------------------------------------------------------------------------------------------------------------------------------------------------------------------------------------------------------------------------------------------------------------------------|
| <b>Title and abstract</b>    | 1       | (a) Indicate the study's design with a commonly used term in the title or the abstract<br>(b) Provide in the abstract an informative and balanced summary of what was done and what was found                                                                                                                                                                                                                                                                                                                                                                                                                                                                                                    |
| <b>Introduction</b>          |         |                                                                                                                                                                                                                                                                                                                                                                                                                                                                                                                                                                                                                                                                                                  |
| Background/rationale         | 4       | Explain the scientific background and rationale for the investigation being reported                                                                                                                                                                                                                                                                                                                                                                                                                                                                                                                                                                                                             |
| Objectives                   | 4       | State specific objectives, including any prespecified hypotheses                                                                                                                                                                                                                                                                                                                                                                                                                                                                                                                                                                                                                                 |
| <b>Methods</b>               |         |                                                                                                                                                                                                                                                                                                                                                                                                                                                                                                                                                                                                                                                                                                  |
| Study design                 | 5       | Present key elements of study design early in the paper                                                                                                                                                                                                                                                                                                                                                                                                                                                                                                                                                                                                                                          |
| Setting                      | 5       | Describe the setting, locations, and relevant dates, including periods of recruitment, exposure, follow-up, and data collection                                                                                                                                                                                                                                                                                                                                                                                                                                                                                                                                                                  |
| Participants                 | 5       | (a) <i>Cohort study</i> —Give the eligibility criteria, and the sources and methods of selection of participants. Describe methods of follow-up<br><i>Case-control study</i> —Give the eligibility criteria, and the sources and methods of case ascertainment and control selection. Give the rationale for the choice of cases and controls<br><i>Cross-sectional study</i> —Give the eligibility criteria, and the sources and methods of selection of participants<br>(b) <i>Cohort study</i> —For matched studies, give matching criteria and number of exposed and unexposed<br><i>Case-control study</i> —For matched studies, give matching criteria and the number of controls per case |
| Variables                    | 5-6     | Clearly define all outcomes, exposures, predictors, potential confounders, and effect modifiers. Give diagnostic criteria, if applicable                                                                                                                                                                                                                                                                                                                                                                                                                                                                                                                                                         |
| Data sources/<br>measurement | 6       | For each variable of interest, give sources of data and details of methods of assessment (measurement). Describe comparability of assessment methods if there is more than one group                                                                                                                                                                                                                                                                                                                                                                                                                                                                                                             |
| Bias                         | 6       | Describe any efforts to address potential sources of bias                                                                                                                                                                                                                                                                                                                                                                                                                                                                                                                                                                                                                                        |
| Study size                   | 7       | Explain how the study size was arrived at                                                                                                                                                                                                                                                                                                                                                                                                                                                                                                                                                                                                                                                        |
| Quantitative variables       | 7       | Explain how quantitative variables were handled in the analyses. If applicable, describe which groupings were chosen and why                                                                                                                                                                                                                                                                                                                                                                                                                                                                                                                                                                     |
| Statistical methods          | 7-8     | (a) Describe all statistical methods, including those used to control for confounding<br>(b) Describe any methods used to examine subgroups and interactions<br>(c) Explain how missing data were addressed<br>(d) <i>Cohort study</i> —If applicable, explain how loss to follow-up was addressed<br><i>Case-control study</i> —If applicable, explain how matching of cases and controls was addressed<br><i>Cross-sectional study</i> —If applicable, describe analytical methods taking account of sampling strategy<br>(e) Describe any sensitivity analyses                                                                                                                                |

Continued on next page

**Results**

|                  |      |                                                                                                                                                                                                                                                                                                                                                                                                               |
|------------------|------|---------------------------------------------------------------------------------------------------------------------------------------------------------------------------------------------------------------------------------------------------------------------------------------------------------------------------------------------------------------------------------------------------------------|
| Participants     | 8    | (a) Report numbers of individuals at each stage of study—eg numbers potentially eligible, examined for eligibility, confirmed eligible, included in the study, completing follow-up, and analysed<br>(b) Give reasons for non-participation at each stage<br>(c) Consider use of a flow diagram                                                                                                               |
| Descriptive data | 8    | (a) Give characteristics of study participants (eg demographic, clinical, social) and information on exposures and potential confounders<br>(b) Indicate number of participants with missing data for each variable of interest<br>(c) <i>Cohort study</i> —Summarise follow-up time (eg, average and total amount)                                                                                           |
| Outcome data     | 9    | <i>Cohort study</i> —Report numbers of outcome events or summary measures over time<br><i>Case-control study</i> —Report numbers in each exposure category, or summary measures of exposure<br><i>Cross-sectional study</i> —Report numbers of outcome events or summary measures                                                                                                                             |
| Main results     | 8-10 | (a) Give unadjusted estimates and, if applicable, confounder-adjusted estimates and their precision (eg, 95% confidence interval). Make clear which confounders were adjusted for and why they were included<br>(b) Report category boundaries when continuous variables were categorized<br>(c) If relevant, consider translating estimates of relative risk into absolute risk for a meaningful time period |
| Other analyses   | 10   | Report other analyses done—eg analyses of subgroups and interactions, and sensitivity analyses                                                                                                                                                                                                                                                                                                                |

**Discussion**

|                  |       |                                                                                                                                                                            |
|------------------|-------|----------------------------------------------------------------------------------------------------------------------------------------------------------------------------|
| Key results      | 10    | Summarise key results with reference to study objectives                                                                                                                   |
| Limitations      | 10    | Discuss limitations of the study, taking into account sources of potential bias or imprecision. Discuss both direction and magnitude of any potential bias                 |
| Interpretation   | 10/13 | Give a cautious overall interpretation of results considering objectives, limitations, multiplicity of analyses, results from similar studies, and other relevant evidence |
| Generalisability | 12    | Discuss the generalisability (external validity) of the study results                                                                                                      |

**Other information**

|         |    |                                                                                                                                                               |
|---------|----|---------------------------------------------------------------------------------------------------------------------------------------------------------------|
| Funding | 12 | Give the source of funding and the role of the funders for the present study and, if applicable, for the original study on which the present article is based |
|---------|----|---------------------------------------------------------------------------------------------------------------------------------------------------------------|

\*Give information separately for cases and controls in case-control studies and, if applicable, for exposed and unexposed groups in cohort and cross-sectional studies.

**Note:** An Explanation and Elaboration article discusses each checklist item and gives methodological background and published examples of transparent reporting. The STROBE checklist is best used in conjunction with this article (freely available on the Web sites of PLoS Medicine at <http://www.plosmedicine.org/>, Annals of Internal Medicine at <http://www.annals.org/>, and Epidemiology at <http://www.epidem.com/>). Information on the STROBE Initiative is available at [www.strobe-statement.org](http://www.strobe-statement.org).
